# Supplementary material for: Differential roles of ERRFI1 in EGFR and AKT pathway regulation affect cancer proliferation
Source: PubMed Central journal article supplement — EMBO Rep. 2018 Jan 15;19(3):e44767. doi: 10.15252/embr.201744767 (PMC5835844; doi:10.15252/embr.201744767), 2018-01-15

**Fig 4A**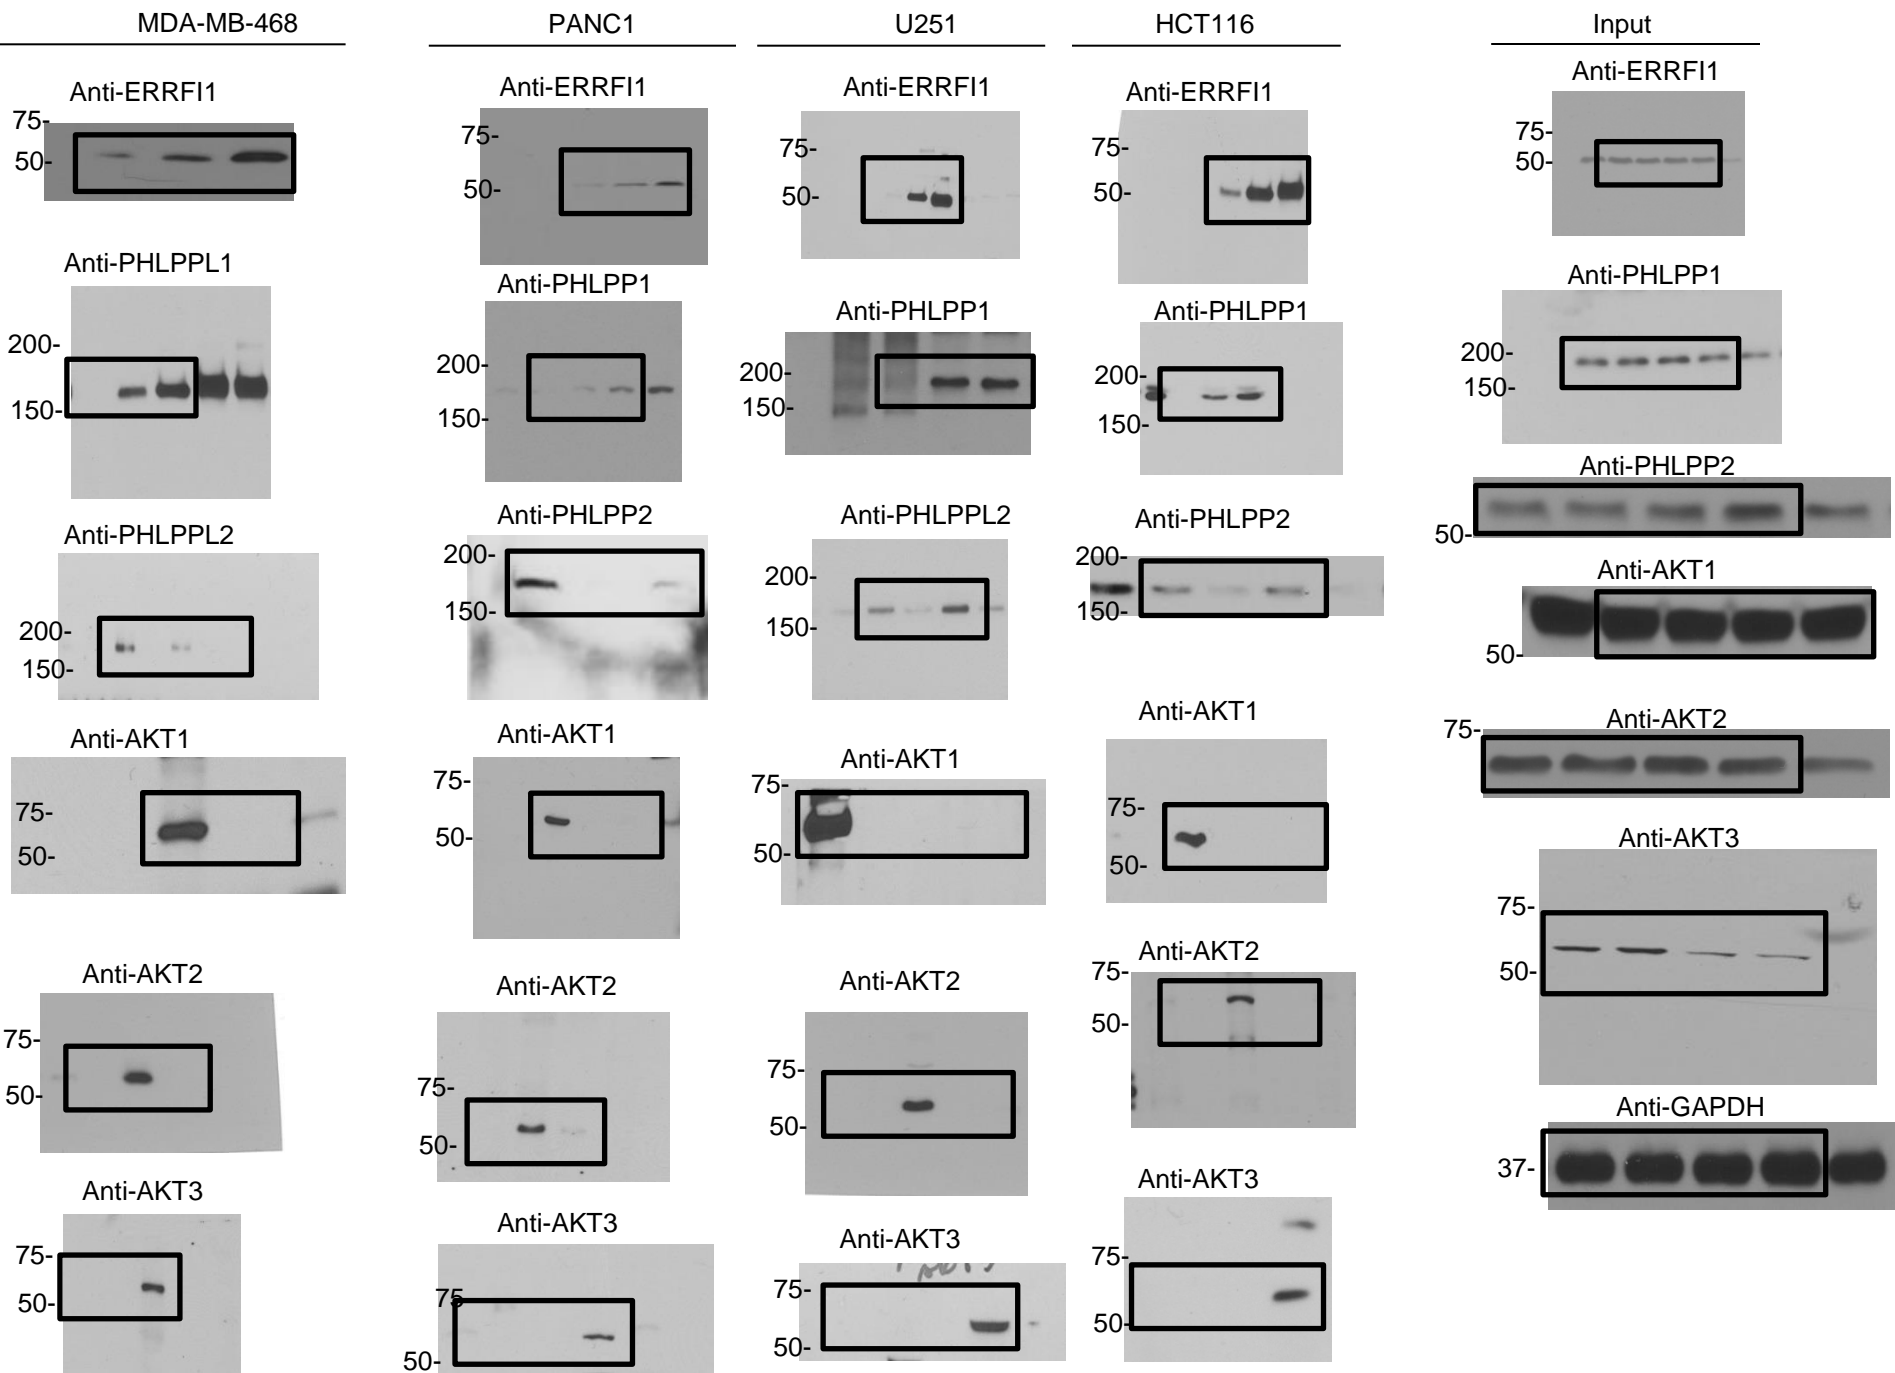

Fig 4A

MDA-MB-468

PANC1

U251

HCT116

Anti-AKT1

Anti-AKT1

Anti-AKT1

Anti-AKT1

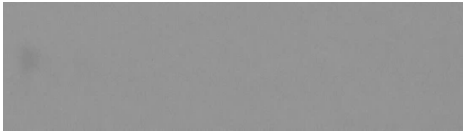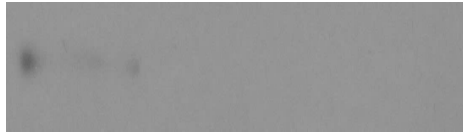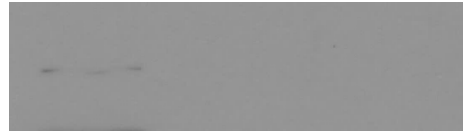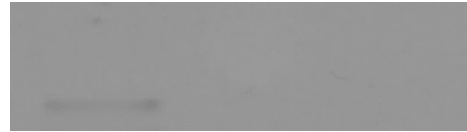

Anti-AKT2

Anti-AKT2

Anti-AKT2

Anti-AKT2

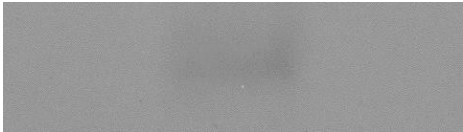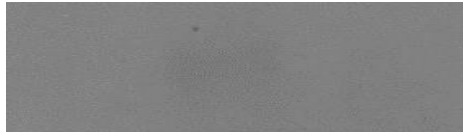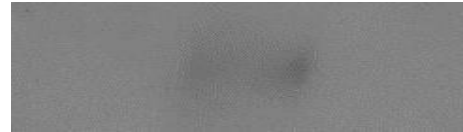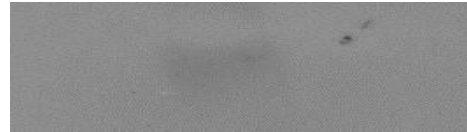

Anti-AKT3

Anti-AKT3

Anti-AKT3

Anti-AKT3

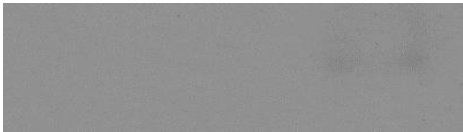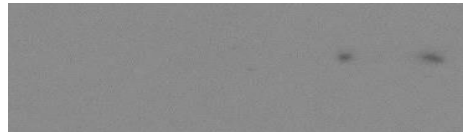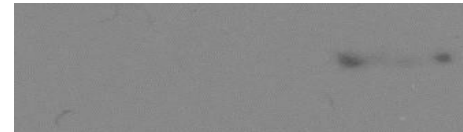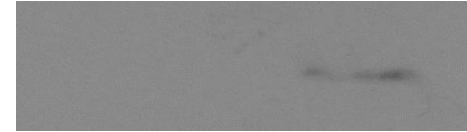

Fig 4D

MDA-MB-468

Anti-ERRFI1

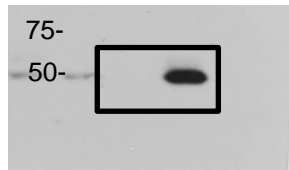

Anti-AKT1

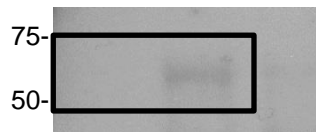

Anti-AKT2

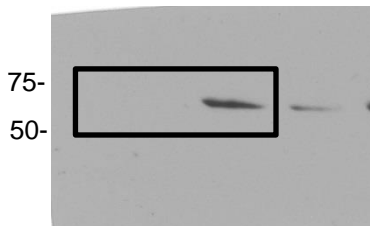

Anti-AKT3

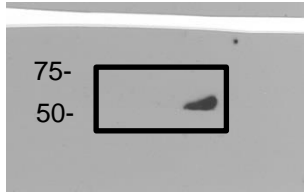

Anti-PHLPP1

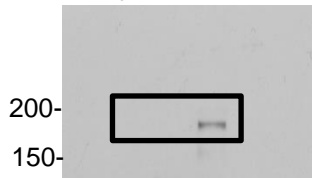

PANC1

Anti-ERRFI1

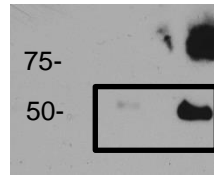

Anti-AKT1

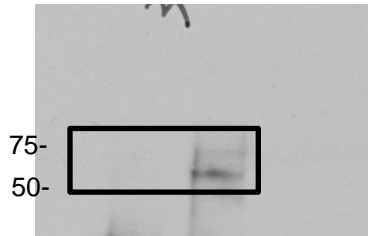

Anti-AKT2

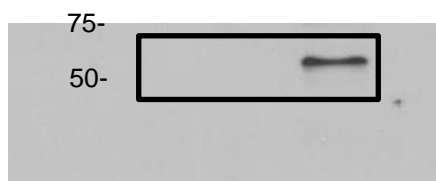

Anti-AKT3

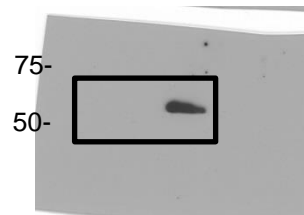

Anti-PHLPP1

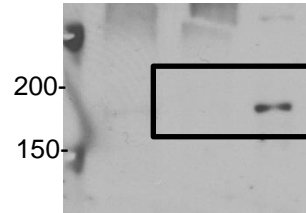

U251

Anti-ERRFI1

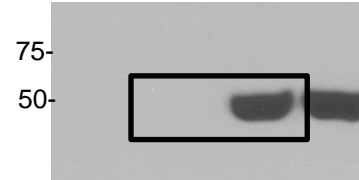

Anti-AKT1

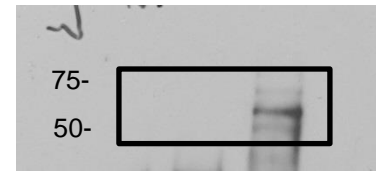

Anti-AKT2

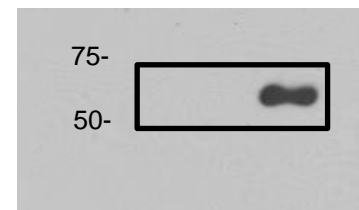

Anti-AKT3

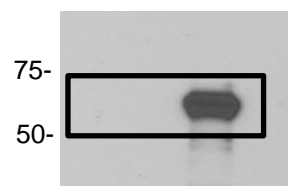

Anti-PHLPP1

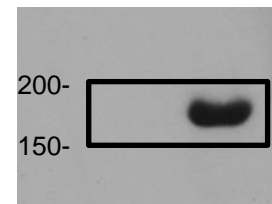

HCT116

Anti-ERRFI1

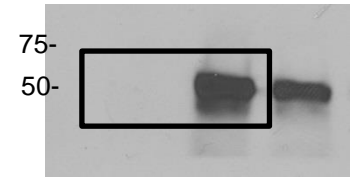

Anti-AKT1

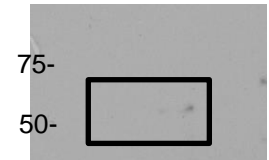

Anti-AKT2

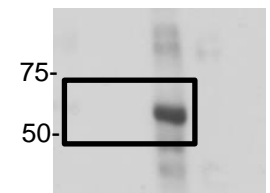

Anti-AKT3

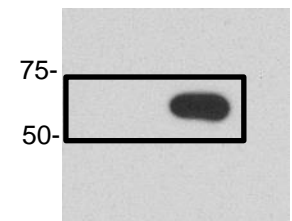

Anti-PHLPP1

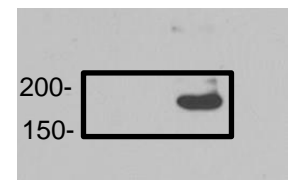

Supplement: EMBR-19-e44767-s009.pdf [file EMBR-19-e44767-s009.pdf]
