# Supplementary material for: Differential roles of ERRFI1 in EGFR and AKT pathway regulation affect cancer proliferation
Source: PubMed Central journal article supplement — EMBO Rep. 2018 Jan 15;19(3):e44767. doi: 10.15252/embr.201744767 (PMC5835844; doi:10.15252/embr.201744767), 2018-01-15
Supplement: EMBR-19-e44767-s001.pdf [file EMBR-19-e44767-s001.pdf]

## Expanded View Figures

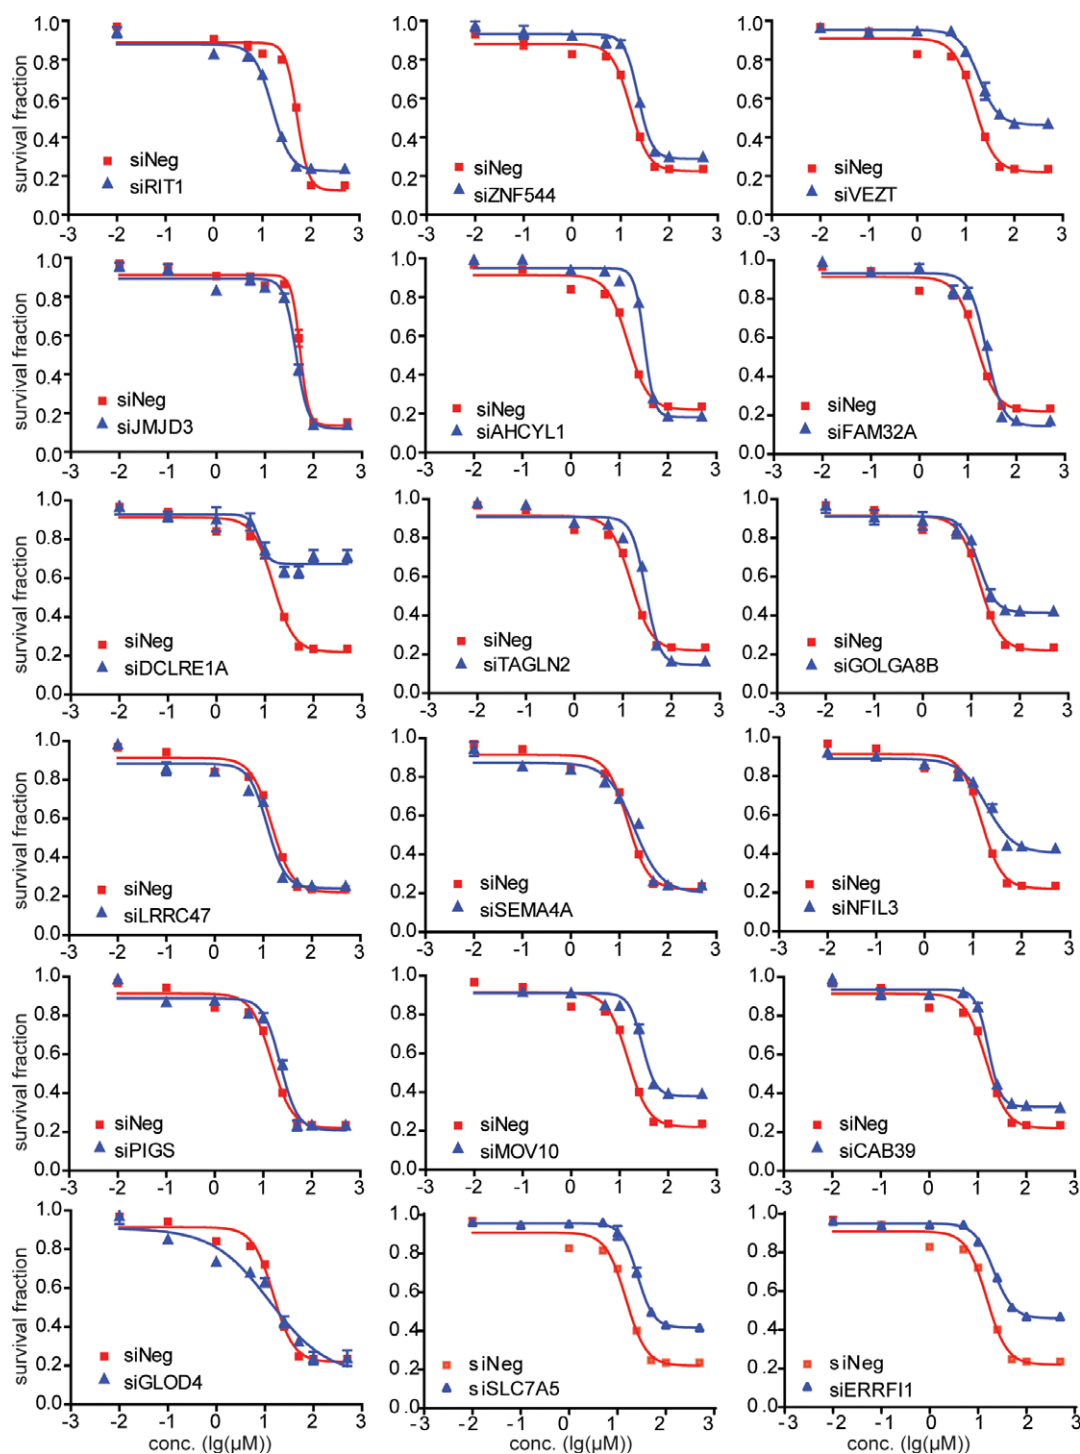

**Figure EV1. Functional validation of candidate genes in human tumor cell lines.**

SU86 cells were transfected with specific siRNA and then treated with 0, 0.01, 0.1, 1, 10, 25, 50, 100, and 500  $\mu\text{M}$  TCN for 72 h. Cell survival was determined. The x-axis indicates drug dose, and the y-axis indicates the survival fraction after TCN exposure. Each point shows the mean values for three independent experiments; error bars represent  $\pm$  SEM.

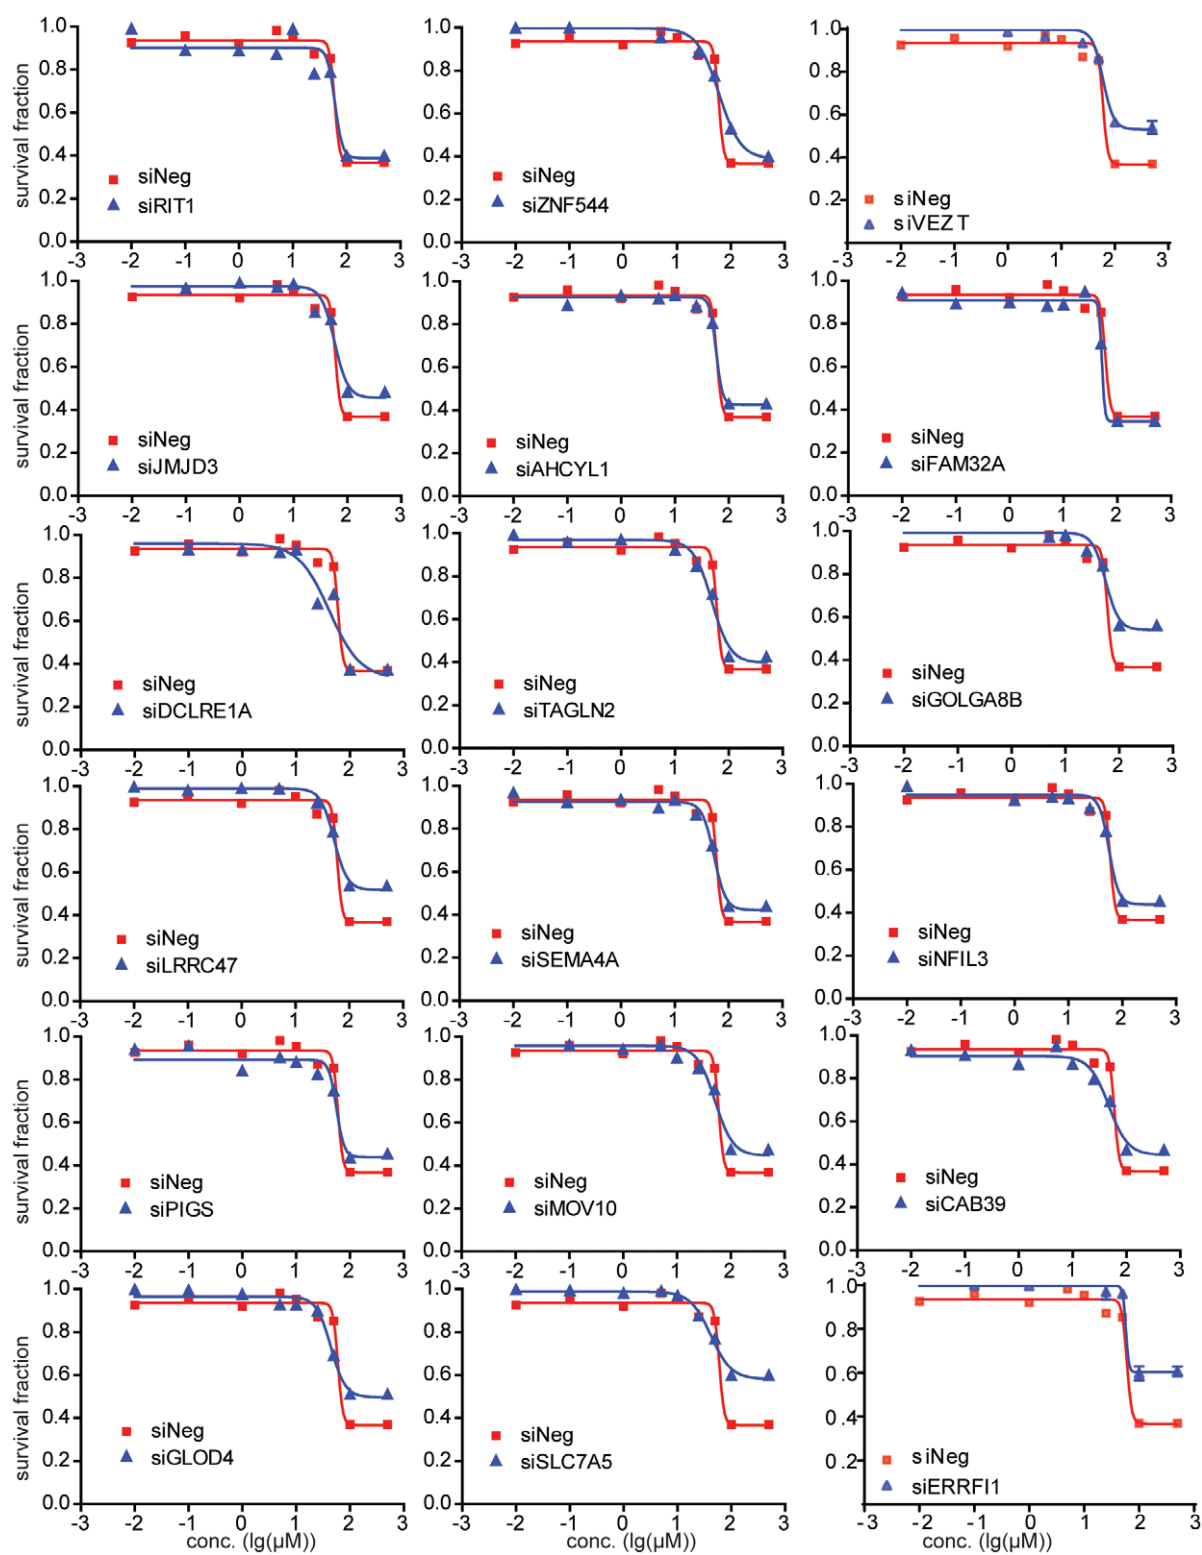

**Figure EV2. Functional validation of candidate genes in human tumor cell lines.**

MDA-MB-231 cells were transfected with specific siRNA and then treated with 0, 0.01, 0.1, 1, 10, 25, 50, 100, and 500  $\mu\text{M}$  TCN for 72 h. Cell survival was determined. Each point shows the mean values for three independent experiments; error bars represent  $\pm$  SEM.

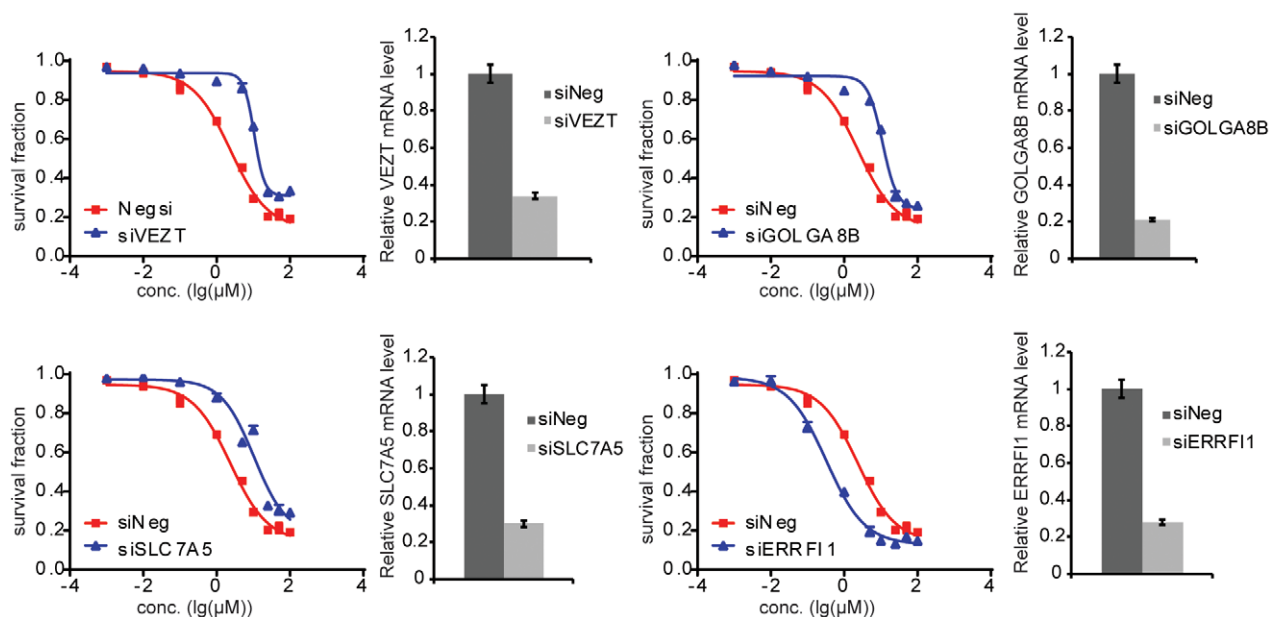

**Figure EV3. Functional validation of candidate genes in LCL.**

LCL were transfected with specific siRNA and then treated with 0, 0.01, 0.1, 1, 10, 25, 50, 100, and 500  $\mu$ M TCN for 72 h. Cell survival was determined using CYQUANT assay. Knockdown efficiency was determined using qRT-PCR. Each point shows the mean values for three independent experiments; error bars represent  $\pm$  SEM.

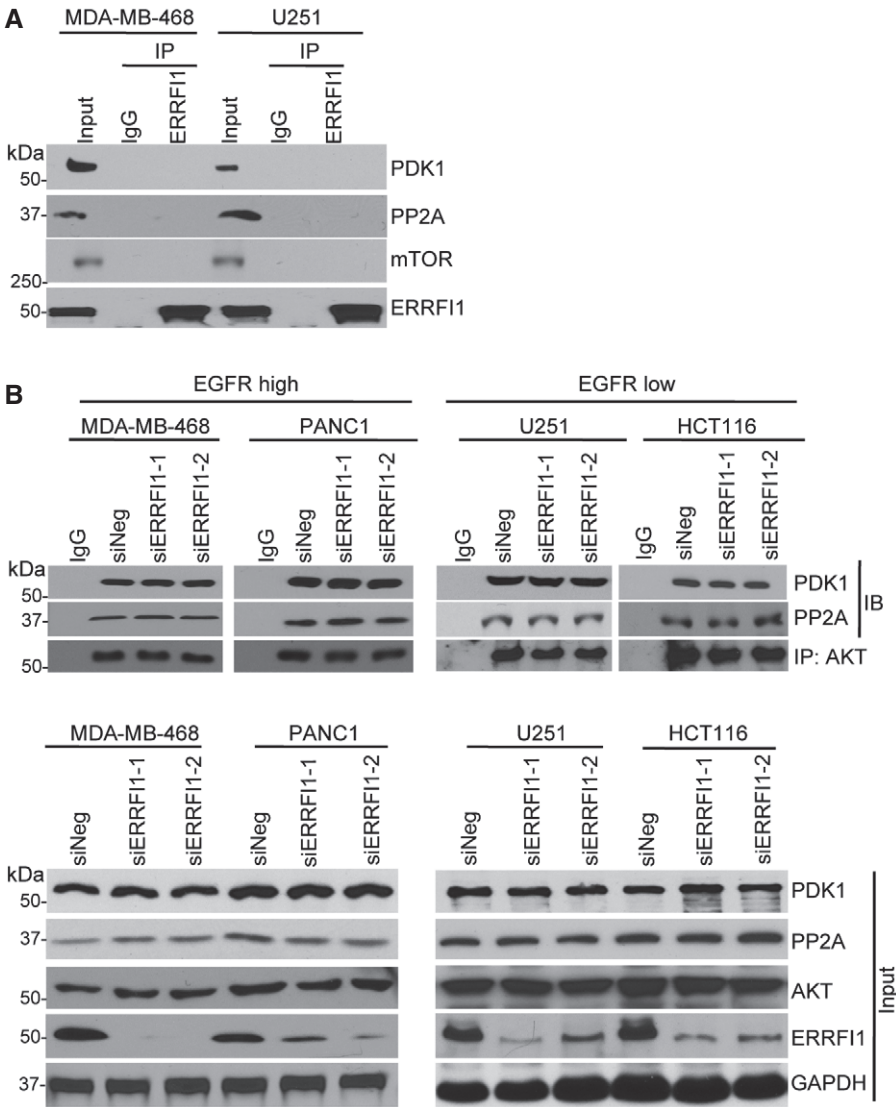

**Figure EV4. ERRF1 does not directly regulate the phosphorylation of AKT at Thr308.**

A MDA-MB-468 and U251 cell lysates were subjected to immunoprecipitation with control IgG or anti-ERRF1 antibody. The immunoprecipitates were blotted with the indicated antibodies.

B MDA-MB-468, PANC1, U251, and HCT116 cells were transfected with siERRF1. Cell lysates were subjected to immunoprecipitation with control IgG or anti-AKT antibody. The immunoprecipitates were blotted with the indicated antibodies.

Source data are available online for this figure.

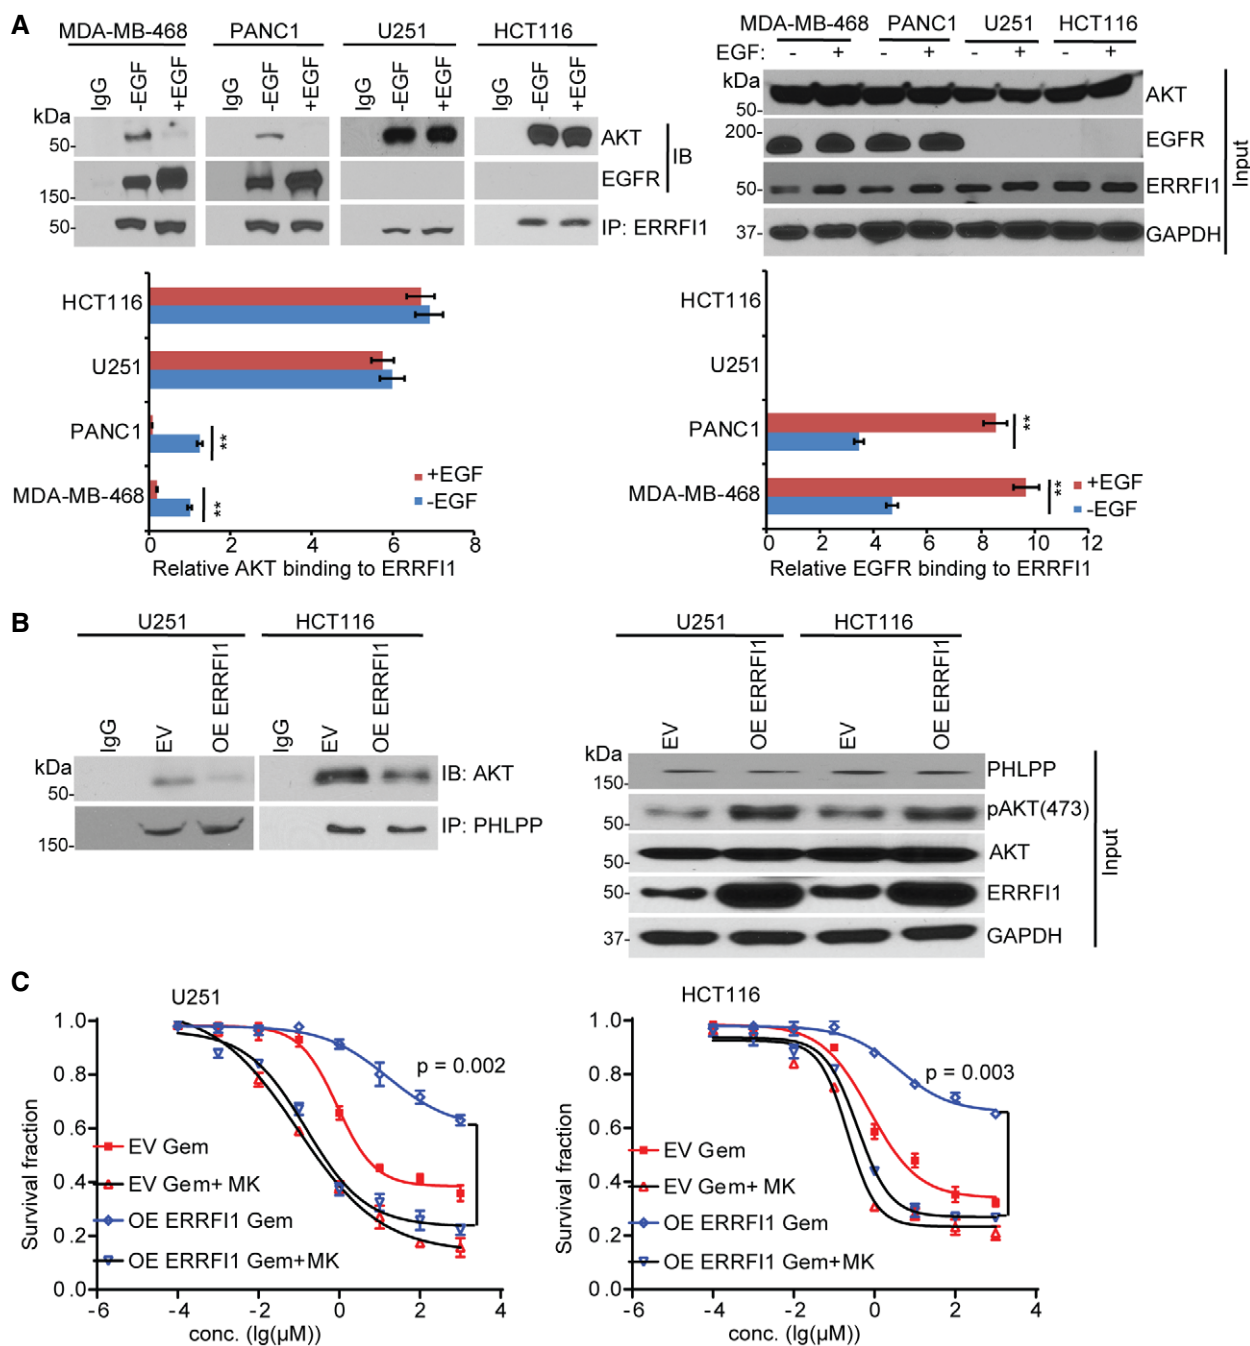

**Figure EV5. ERRF1 regulates AKT-PHLPP interaction.**

A MDA-MB-468, PANC1, U251, and HCT116 cells were serum-starved for 36 h and then treated with EGF (100 ng/ml) for 30 min prior to cell lysis. Cells lysates were subjected to immunoprecipitation with control IgG or anti-ERRF1 antibody. The immunoprecipitates were blotted with the indicated antibodies. The ERRF1-AKT and ERRF1-EGFR interaction was quantified using ImageJ. The immunoprecipitated ERRF1 levels were normalized for each interaction and then corrected for MDA-MB-468 no EGF treatment. The interaction in no EGF-treated (-EGF) MDA-MB-468 is set to 1. Error bars represent  $\pm$  SEM of three independent experiments. The significant difference between vehicle and EGF treatment is indicated by: \*\* $P < 0.01$ . Statistical analyses were performed with Student's  $t$ -test.

B U251 and HCT116 cells were transfected with ERRF1 construct. After 48 h, cells were lysed and subjected to immunoprecipitation with control IgG or anti-PHLPP antibody. The immunoprecipitates were then blotted with the indicated antibodies.

C U251 and HCT116 cells from (B) were treated with increasing dose of gemcitabine (Gem) alone or in combination with 10  $\mu$ M MK-2206 2HCl (MK) for 72 h. Cell survival was then determined. Each point shows the mean values for three independent experiments; error bars represent  $\pm$  SEM.

Source data are available online for this figure.
