# Supplementary figures and images for: Differential roles of ERRFI1 in EGFR and AKT pathway regulation affect cancer proliferation
Source: PubMed Central journal article supplement — EMBO Rep. 2018 Jan 15;19(3):e44767. doi: 10.15252/embr.201744767 (PMC5835844; doi:10.15252/embr.201744767), 2018-01-15

MDA-MB-231

Fig 2A

SU86

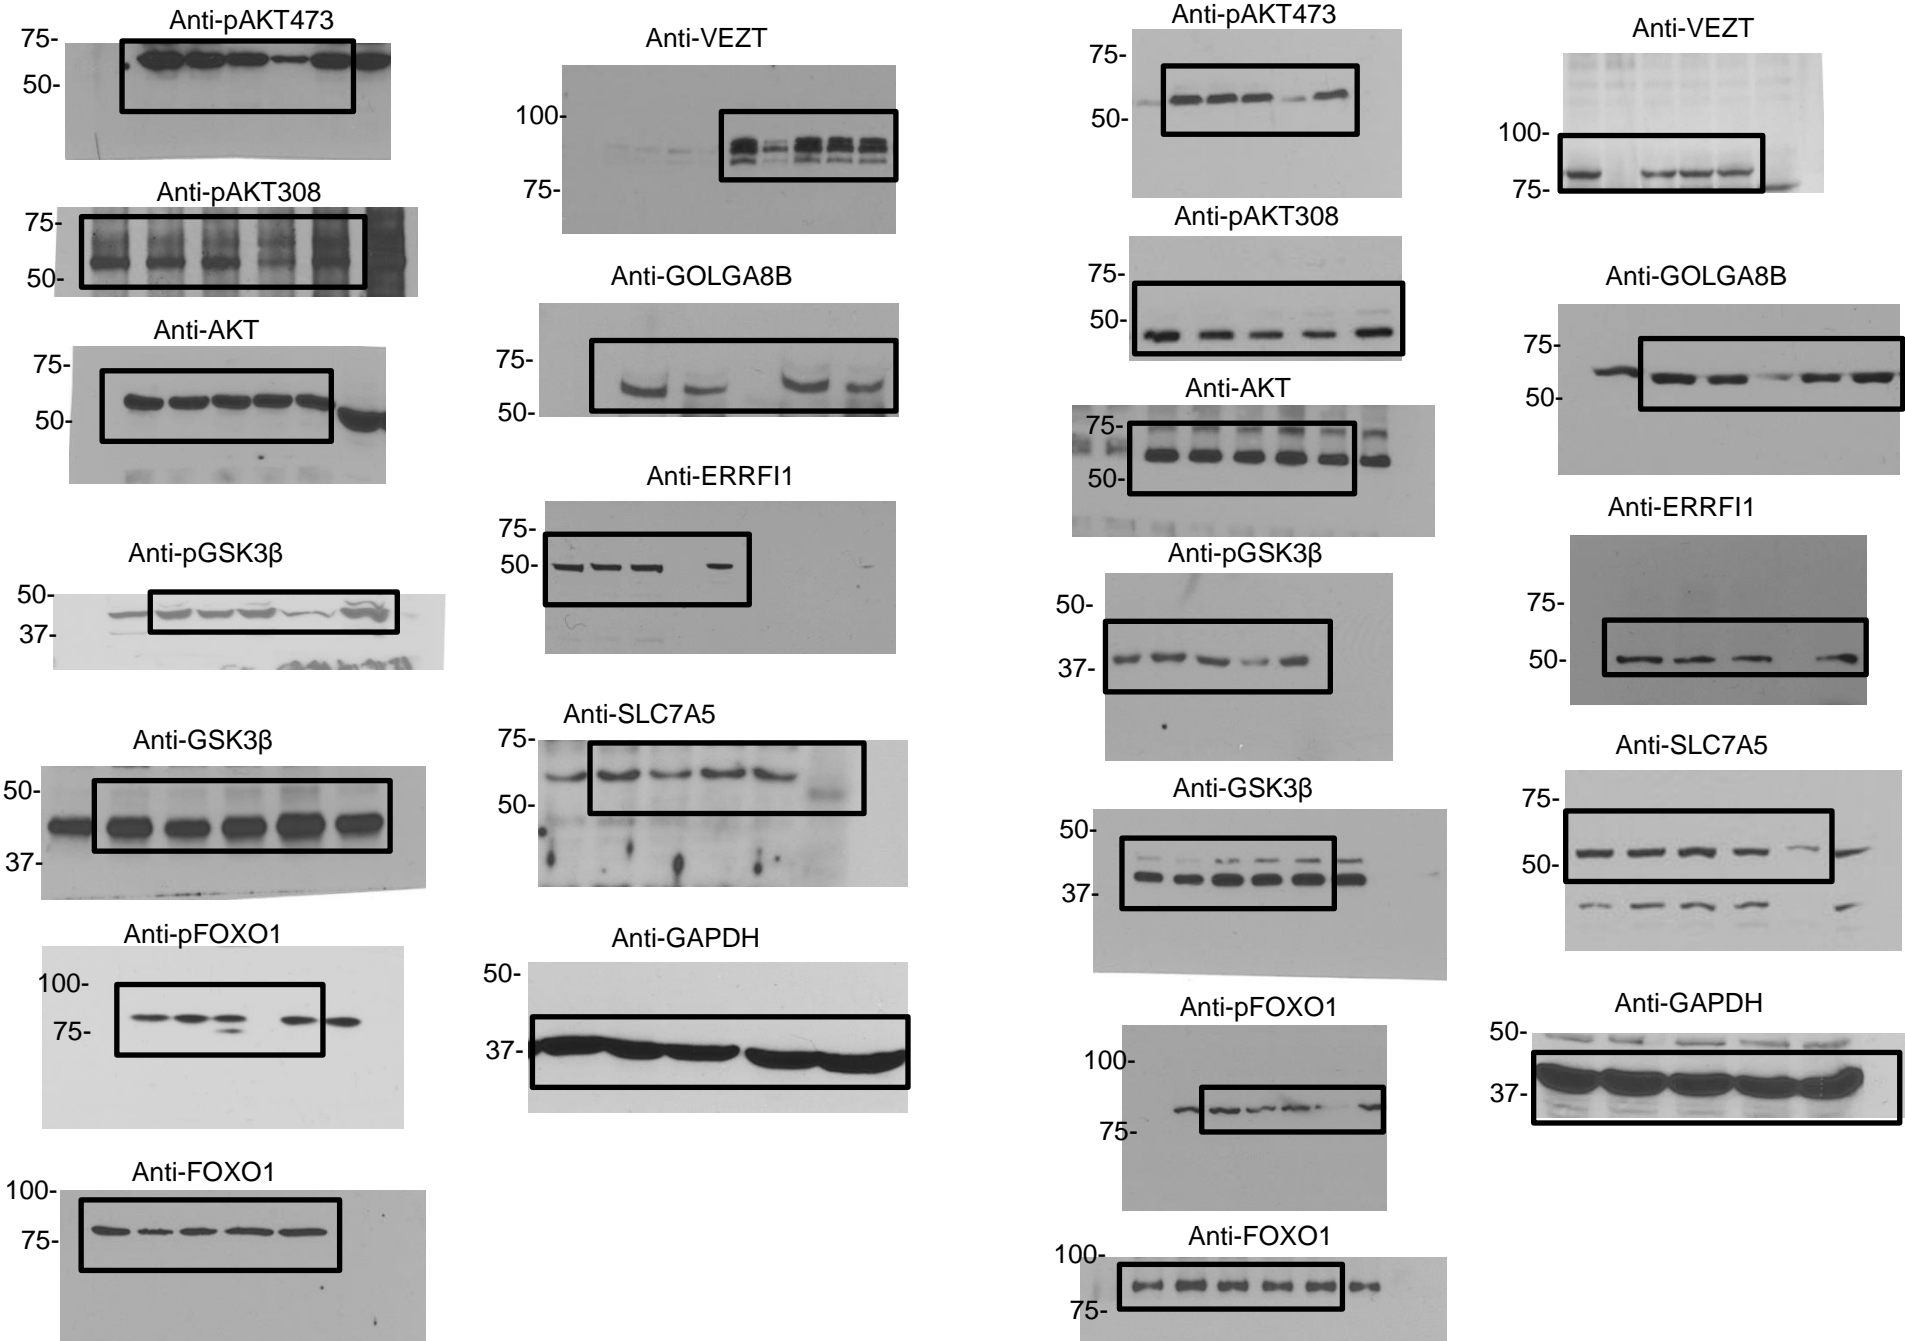

**Fig 2B**

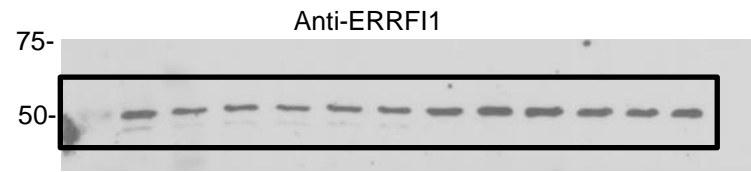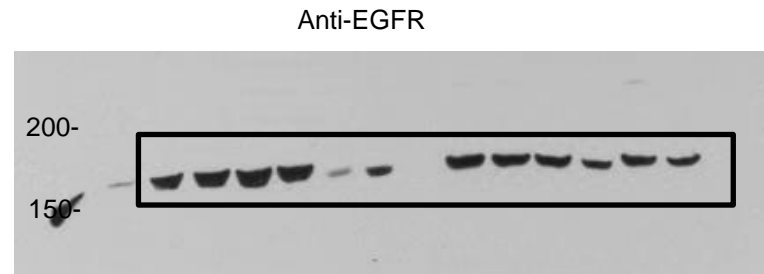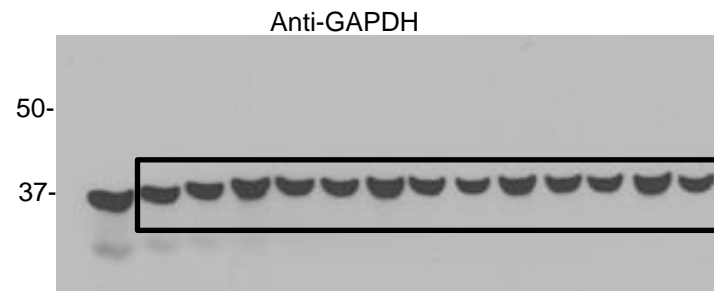

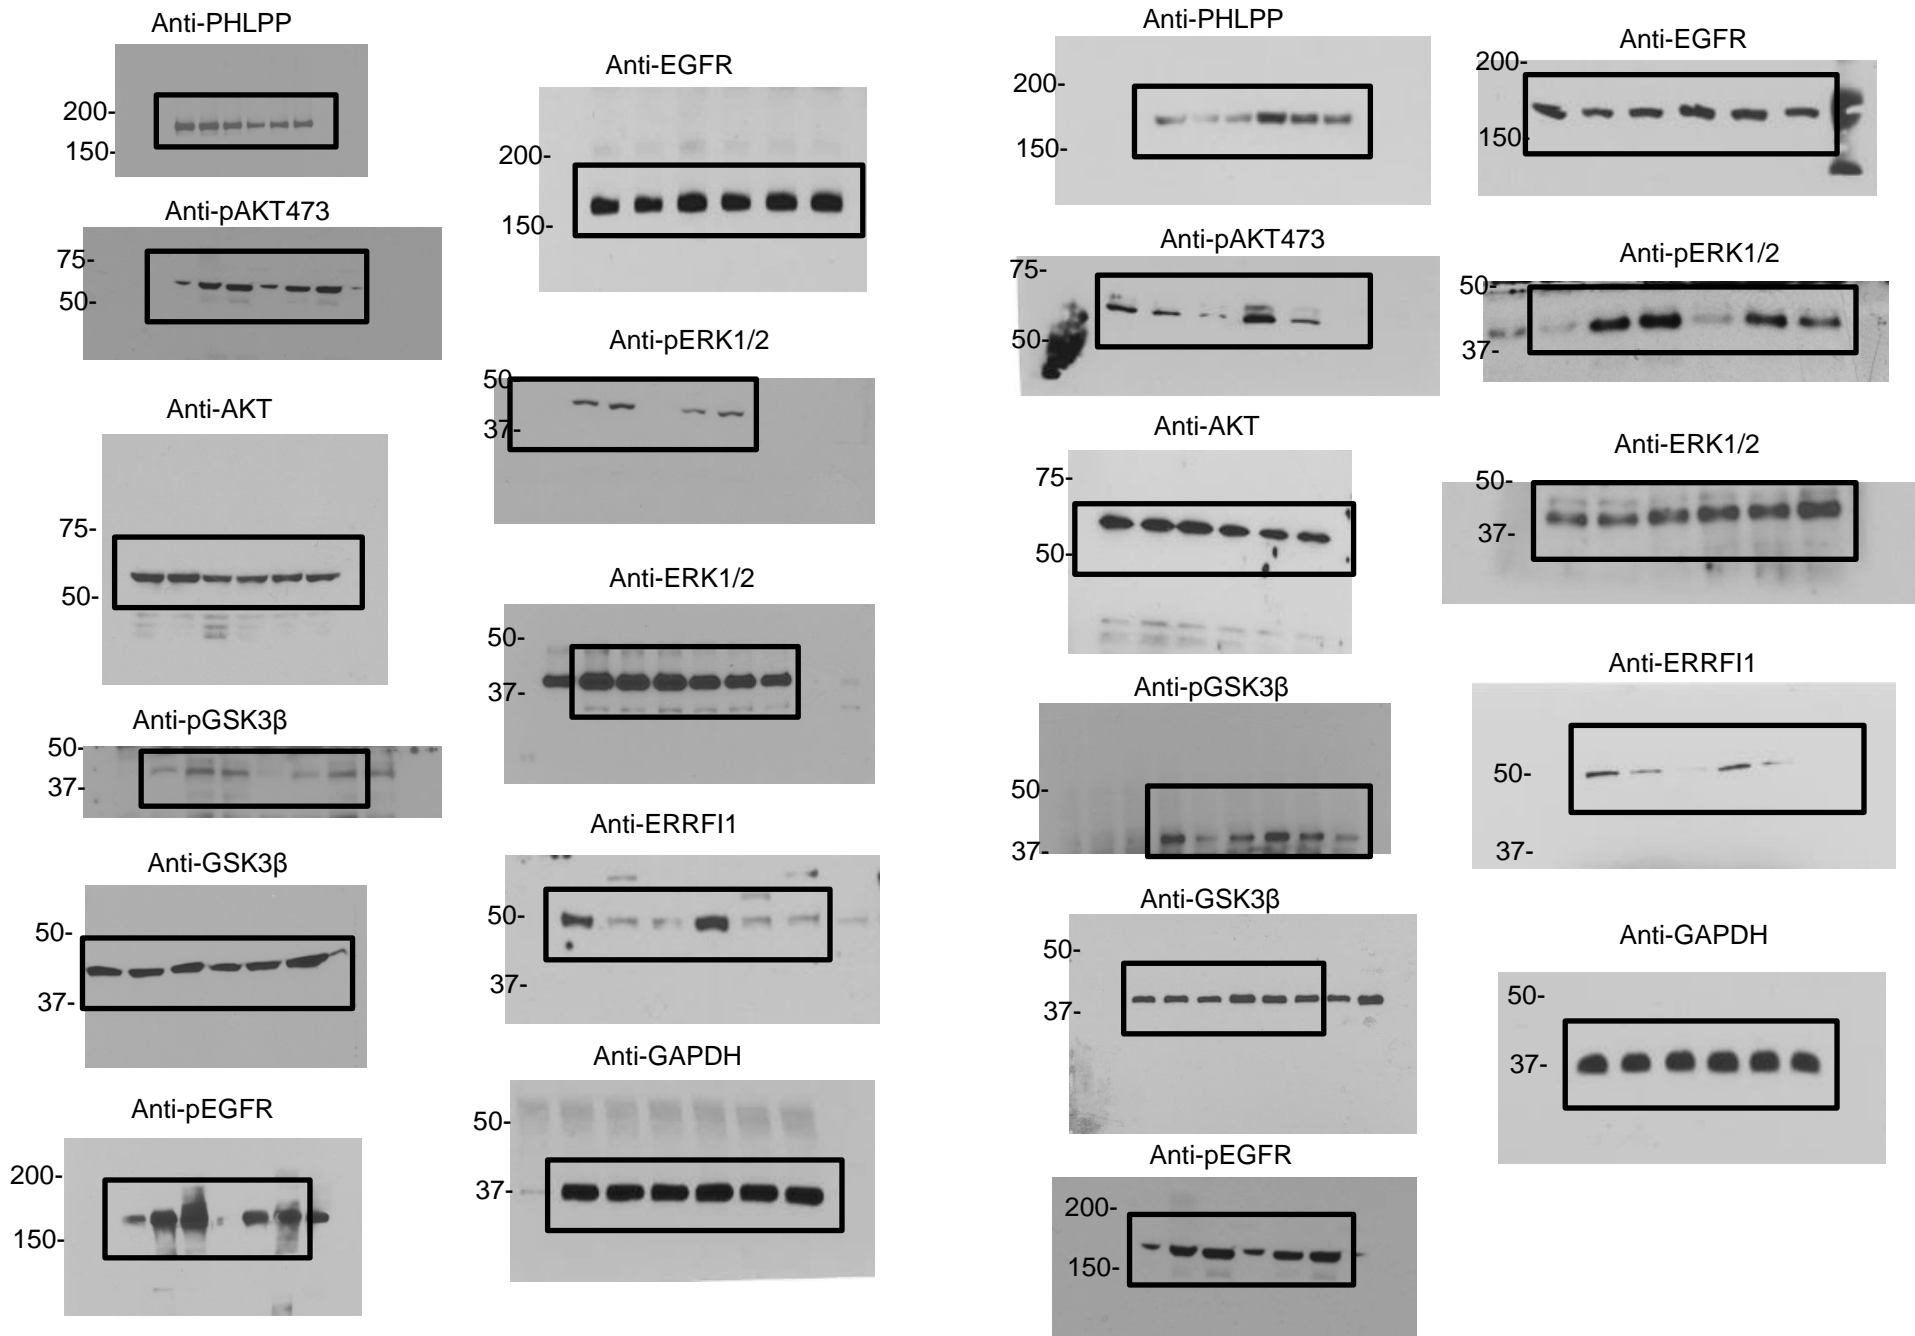

**Fig 2C**

U251 HCT116

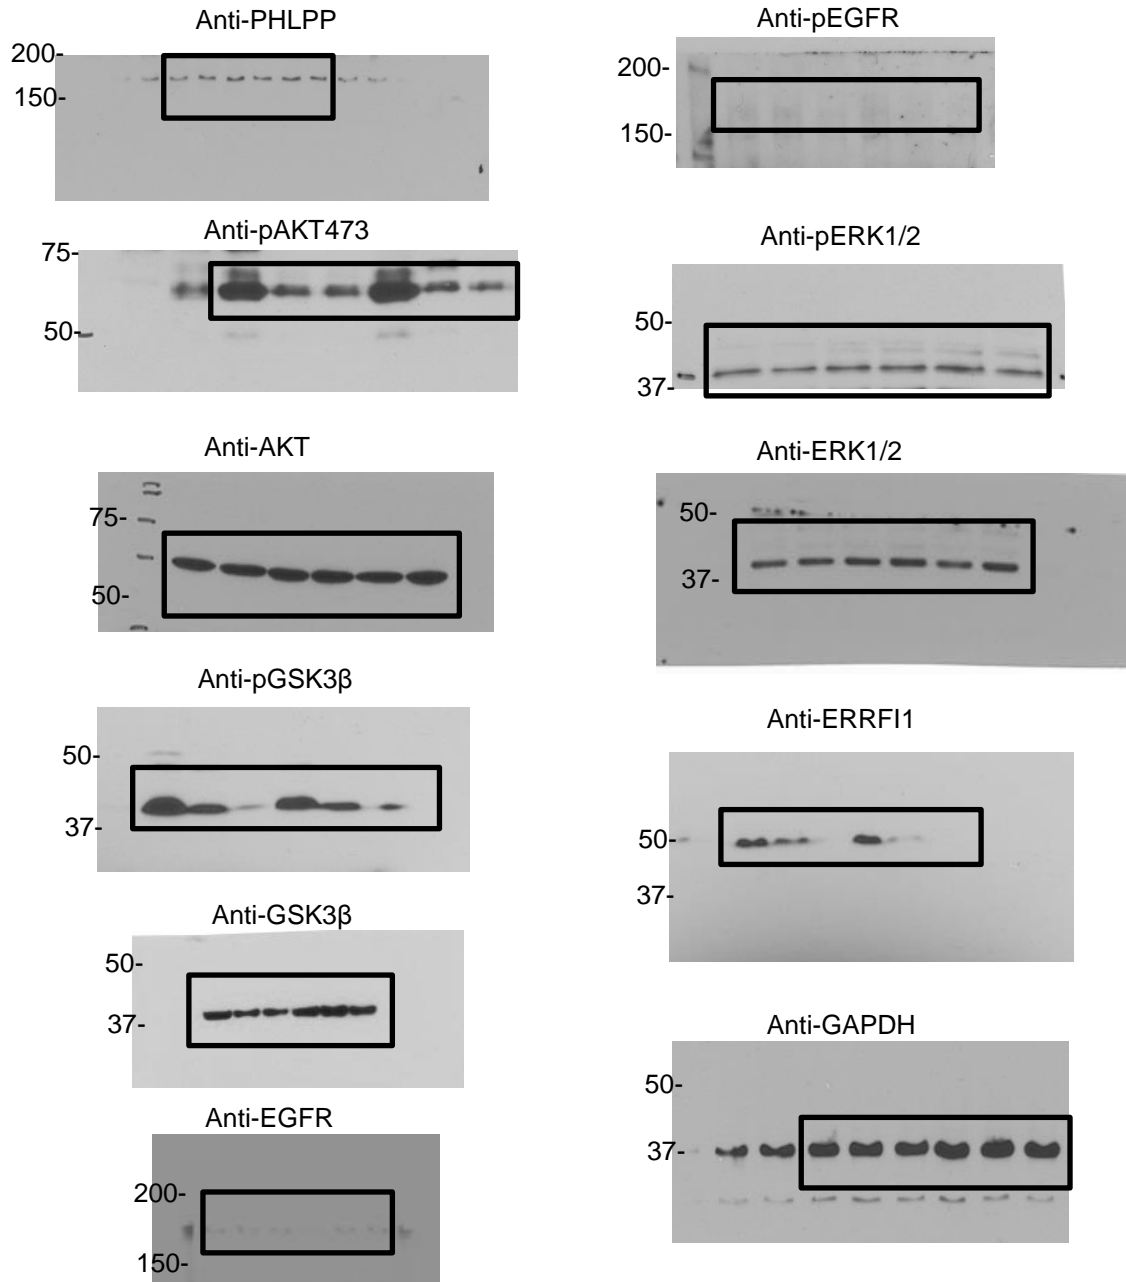

Supplement: EMBR-19-e44767-s007.pdf [file EMBR-19-e44767-s007.pdf]

Fig 3A

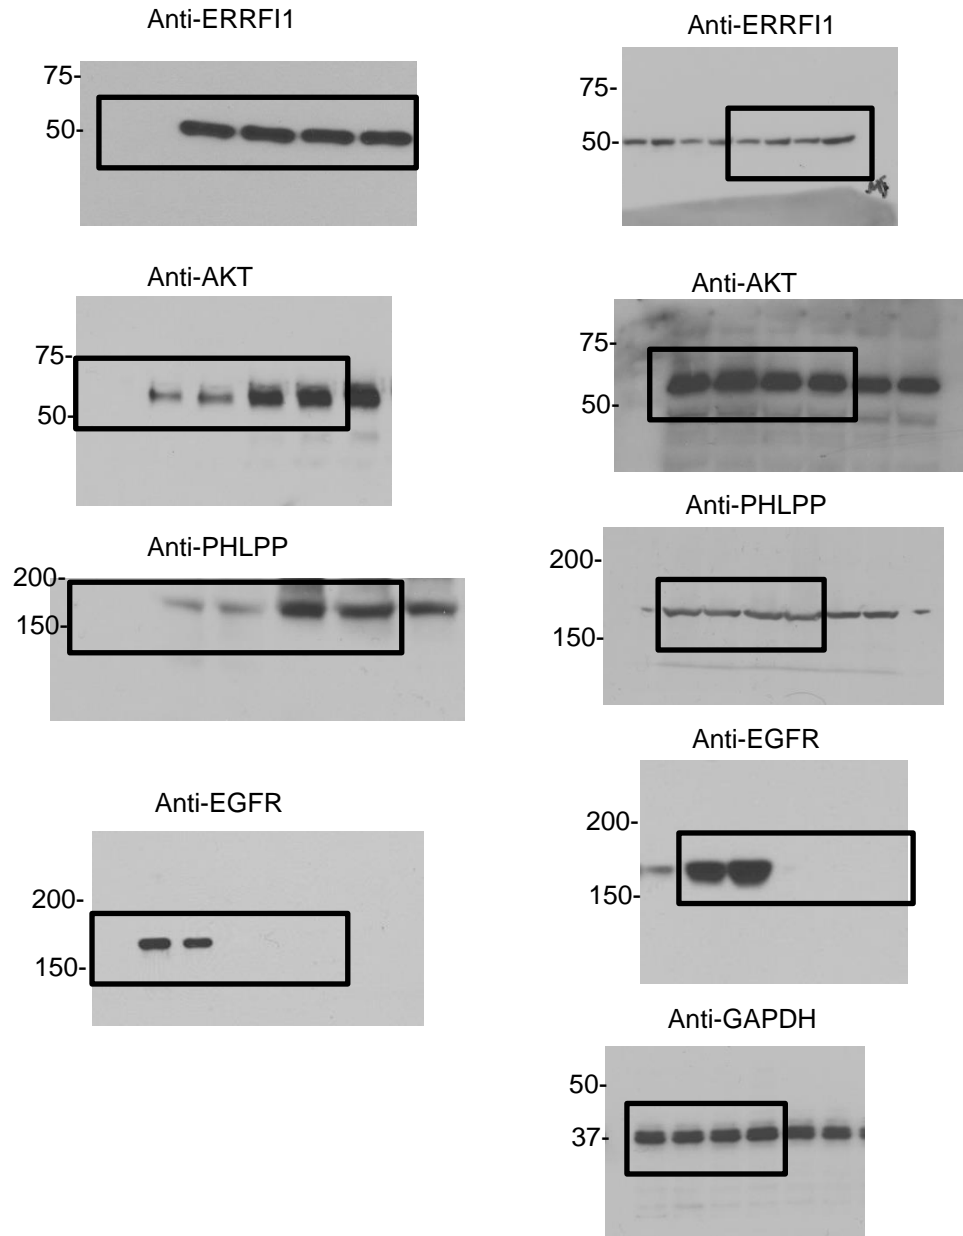

Fig 3B

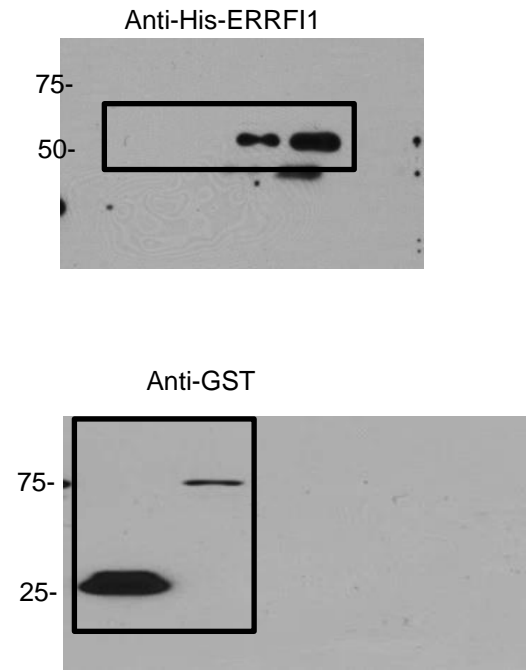

**Fig 3C**

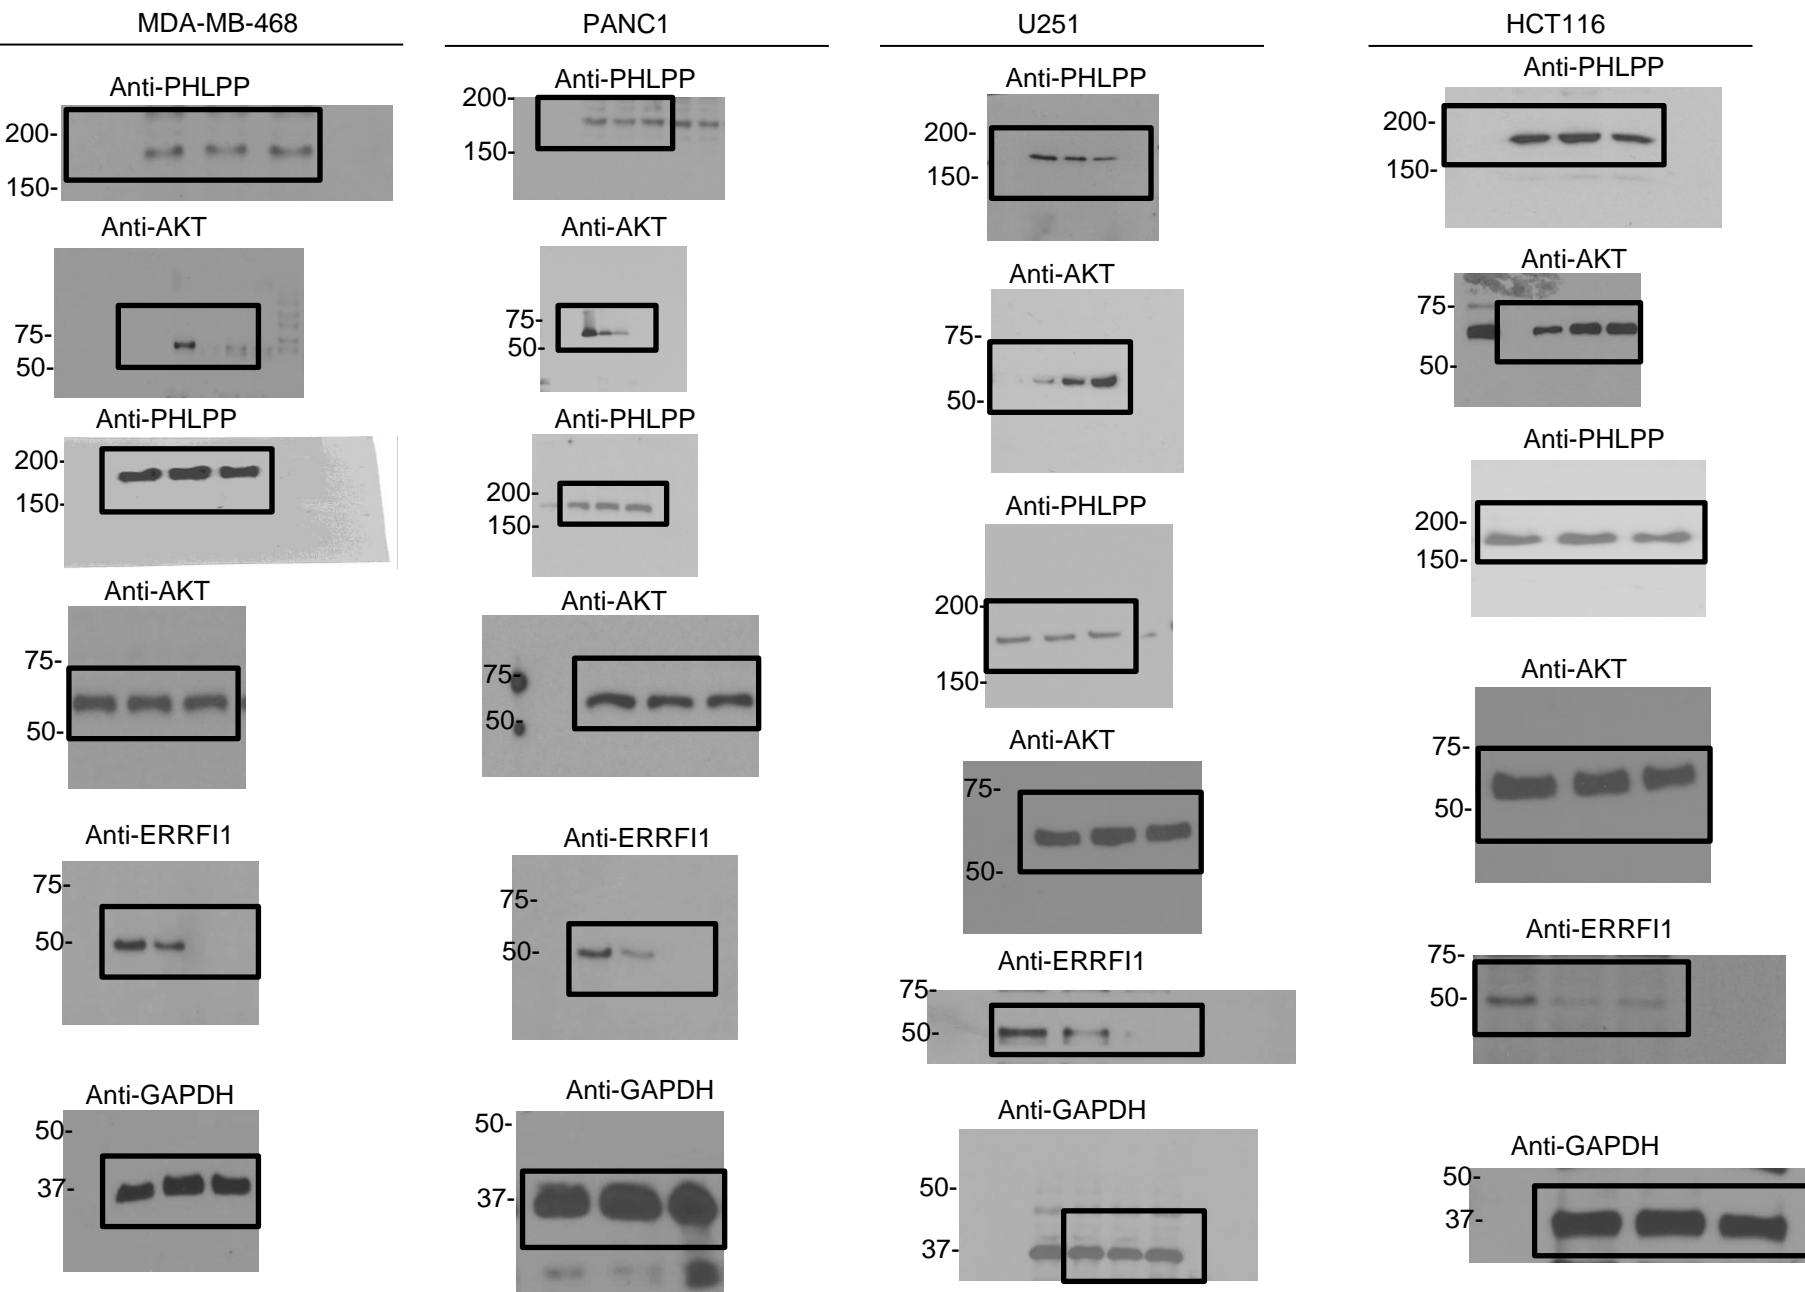

Supplement: EMBR-19-e44767-s008.pdf [file EMBR-19-e44767-s008.pdf]

**Fig 5A**

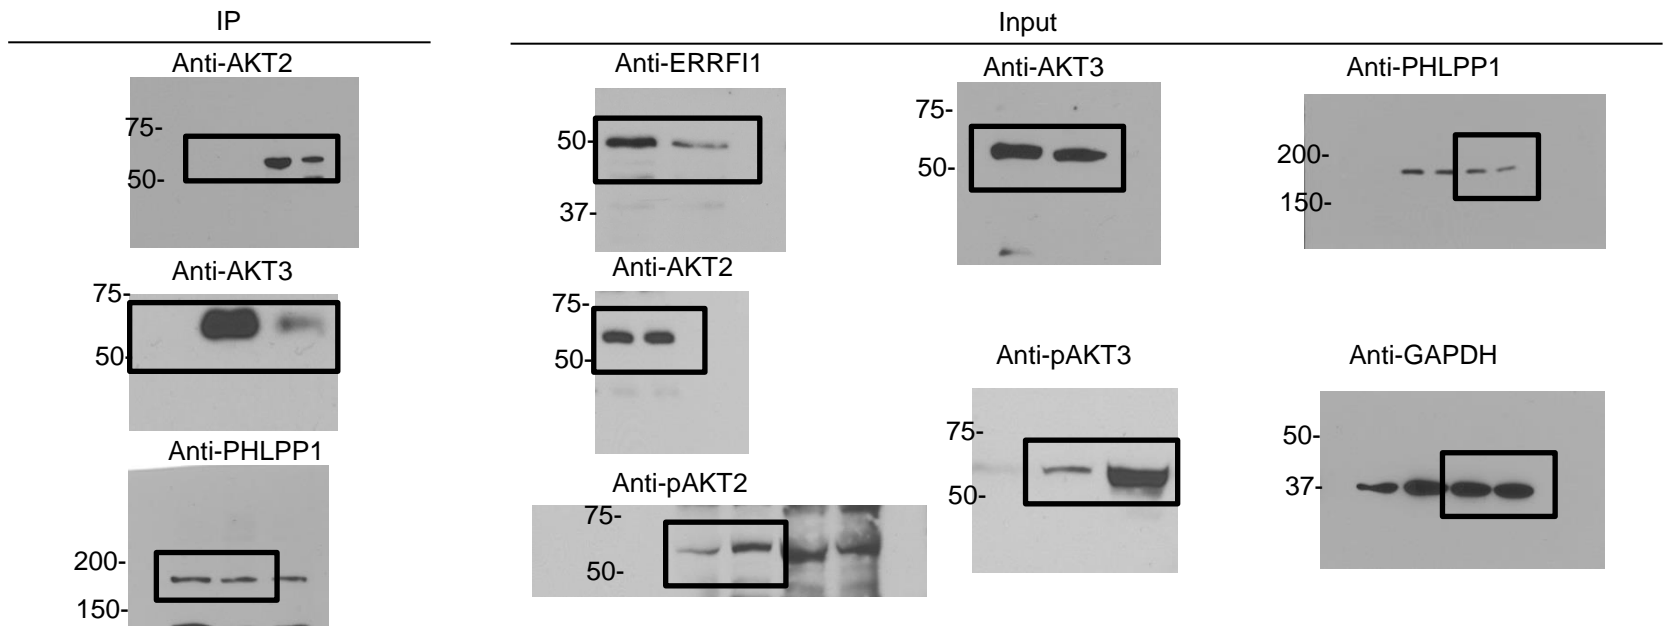

**Fig 5B**

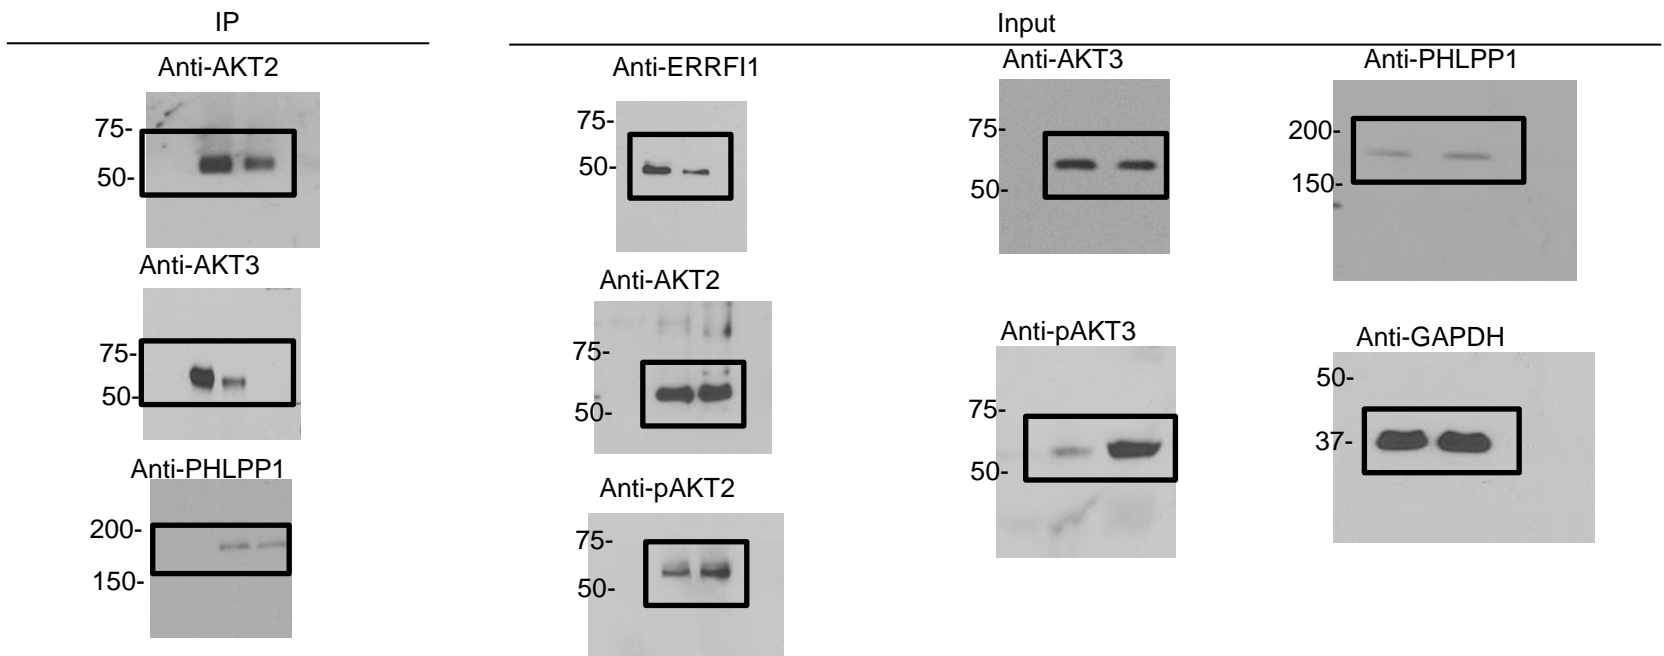

**Fig 5C**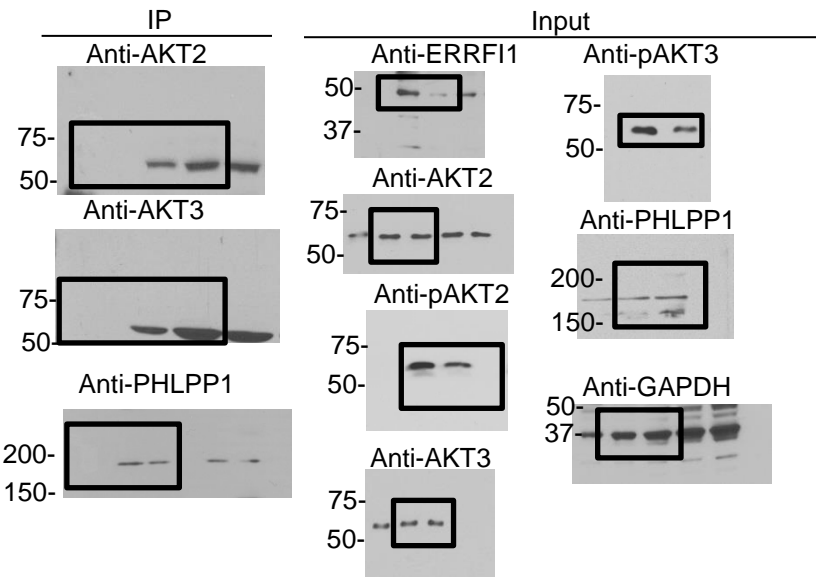**Fig 5D**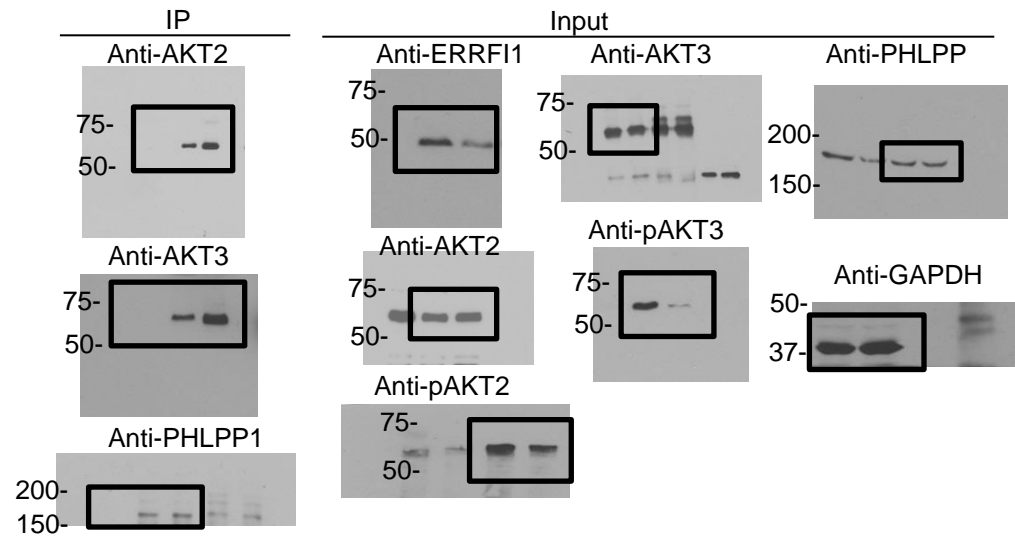**Fig 5E**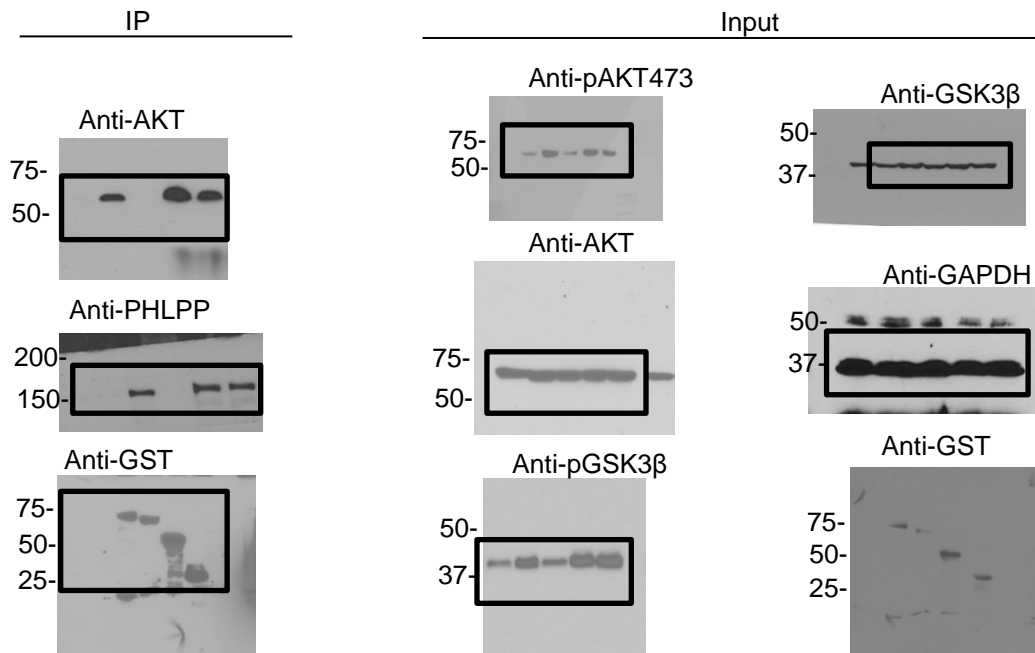

Supplement: EMBR-19-e44767-s010.pdf [file EMBR-19-e44767-s010.pdf]

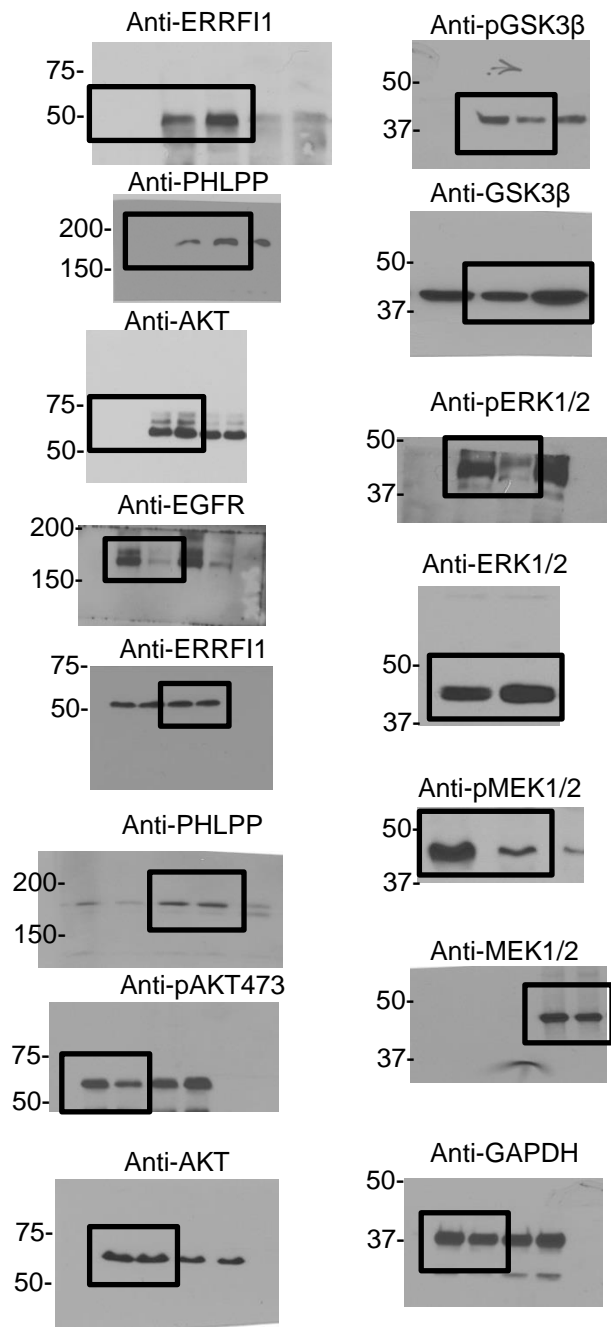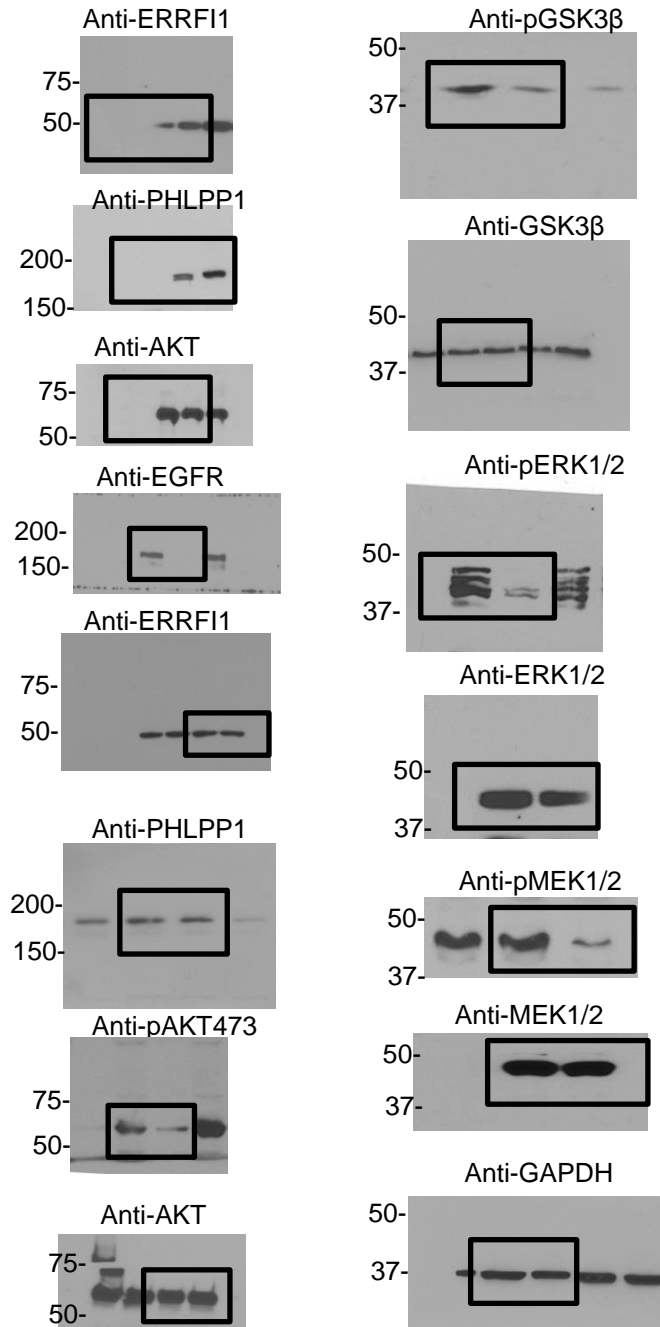

U251

Fig 6

HCT116

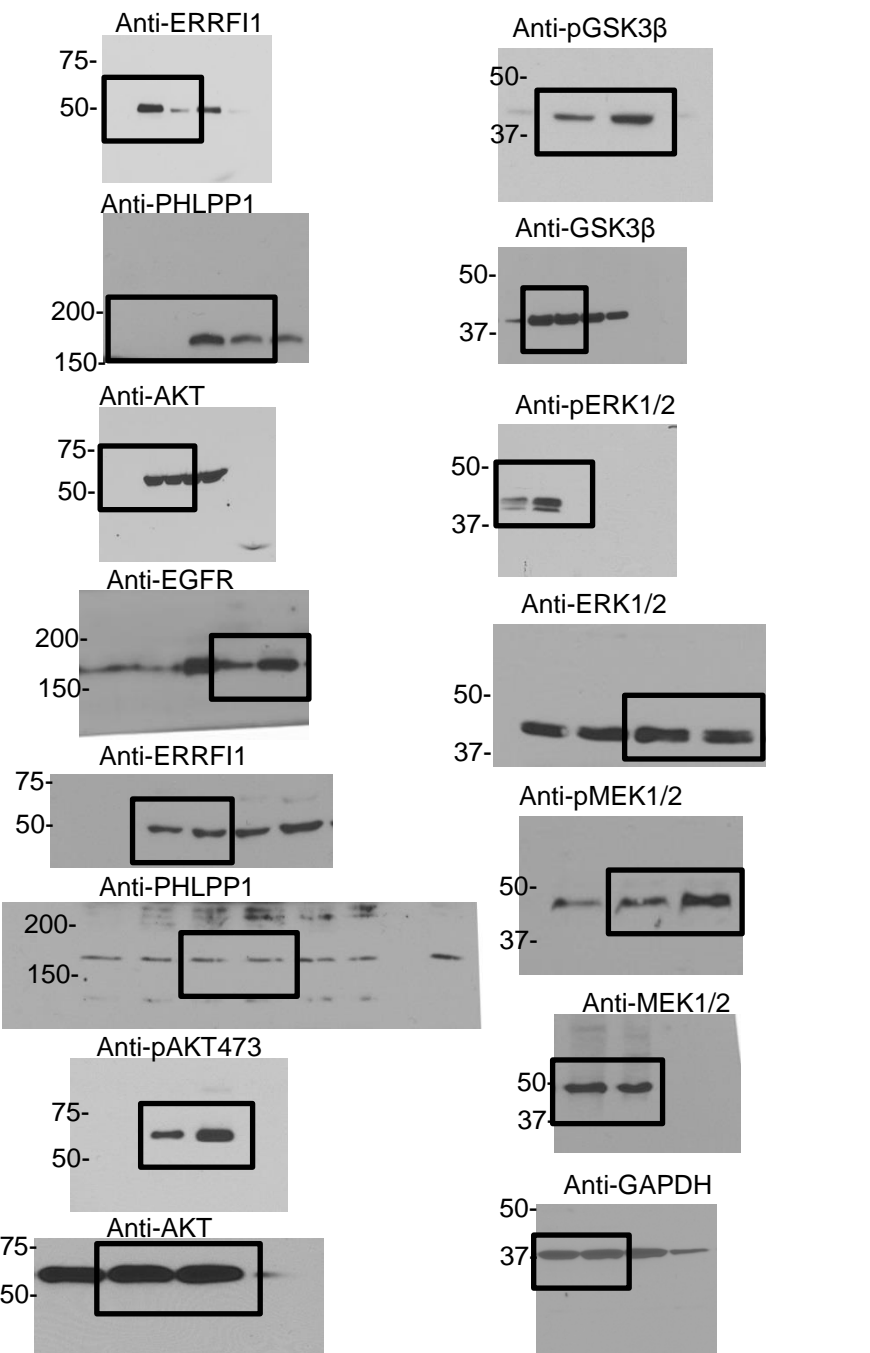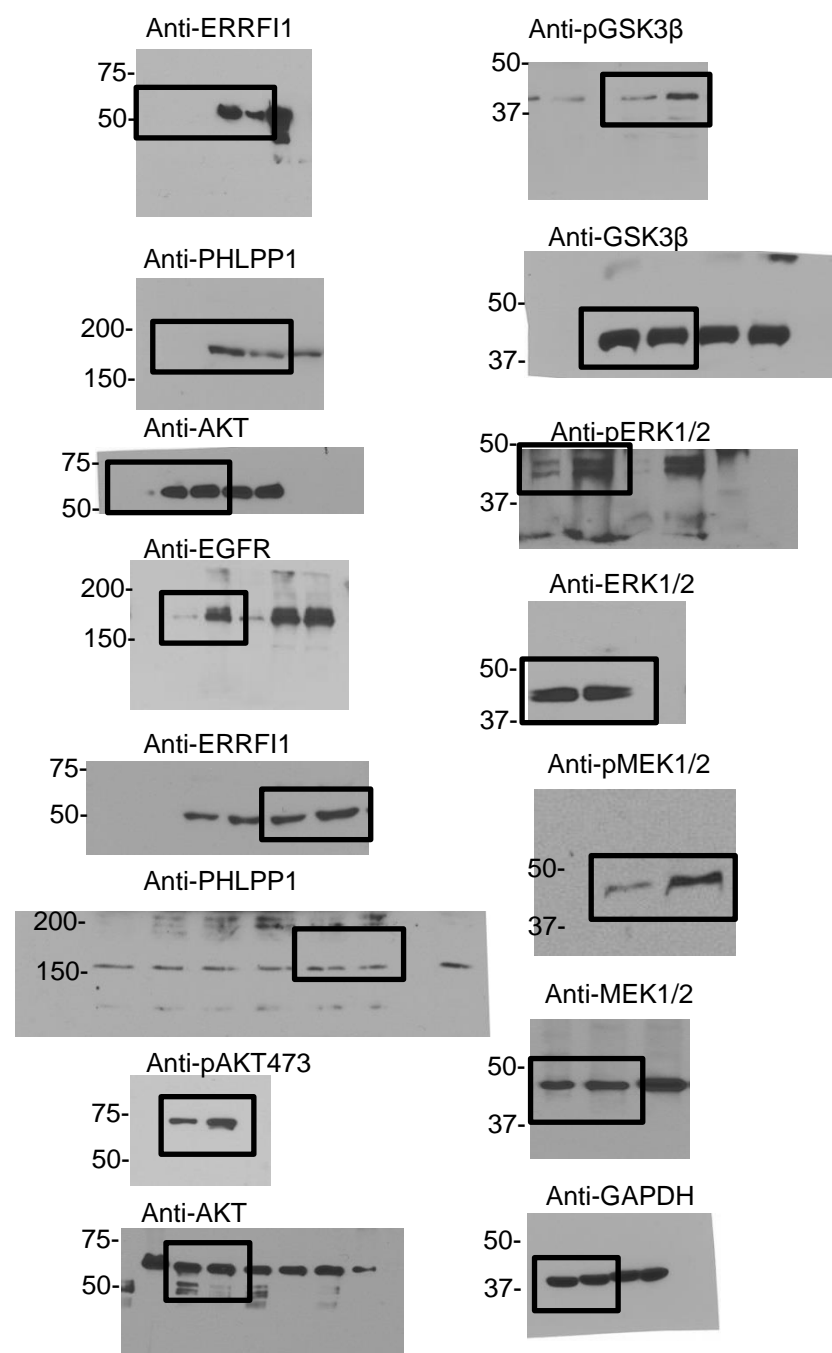

Supplement: EMBR-19-e44767-s011.pdf [file EMBR-19-e44767-s011.pdf]

**Fig 7A**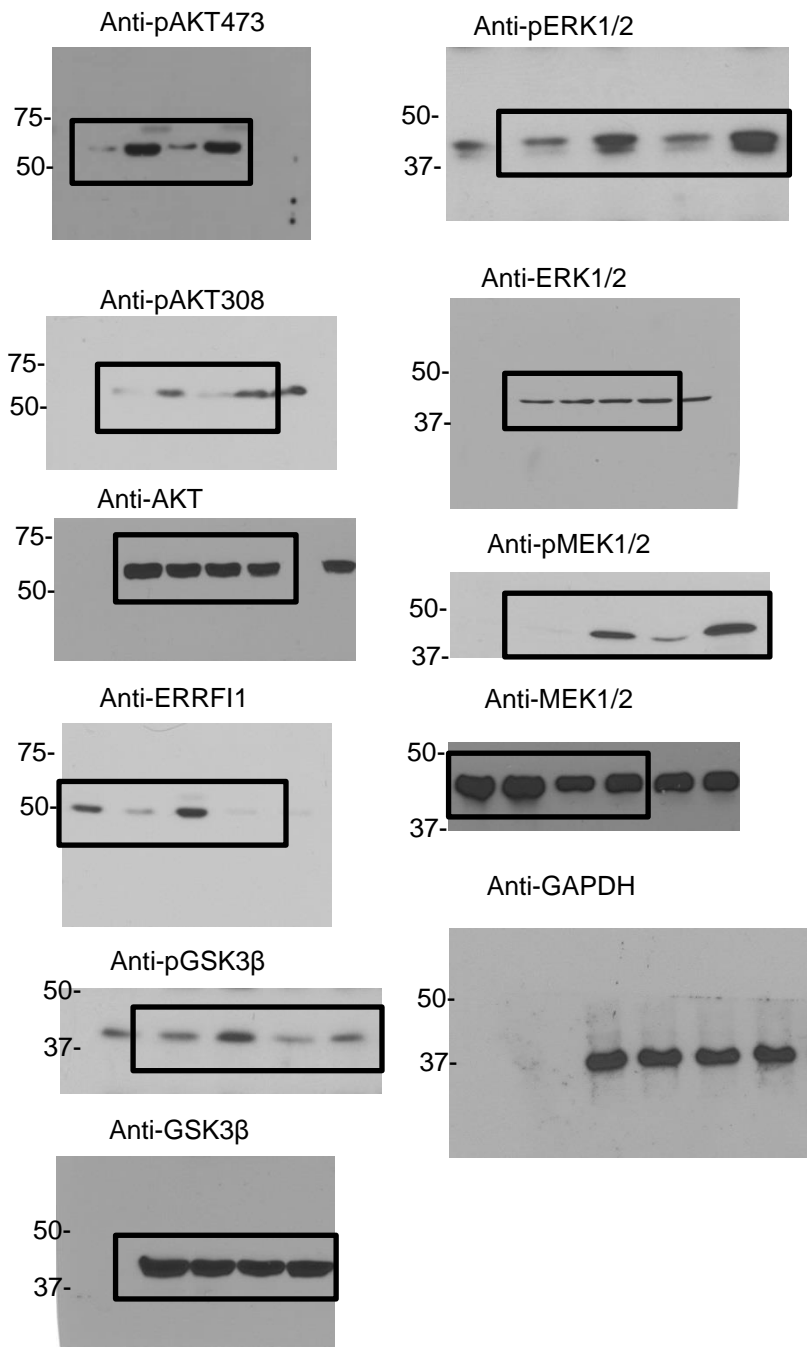**Fig 7B**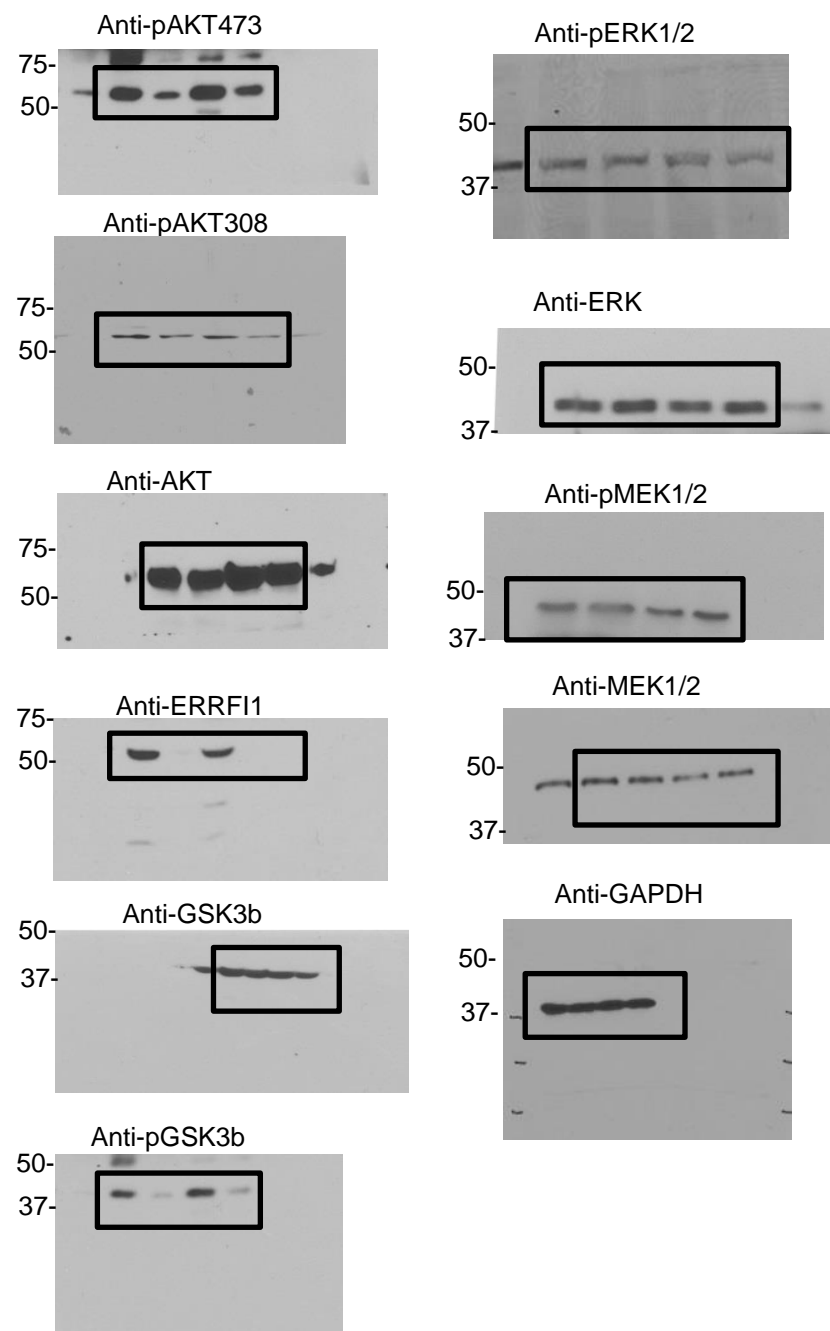

**Fig 7C**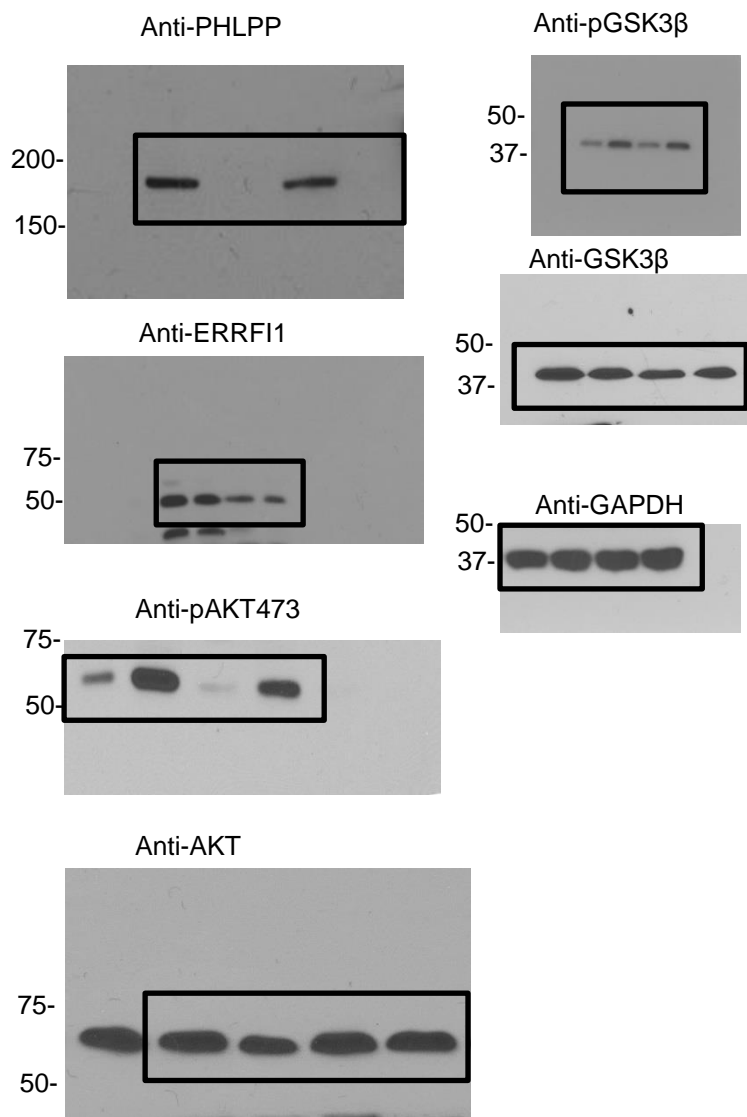**Fig 7D**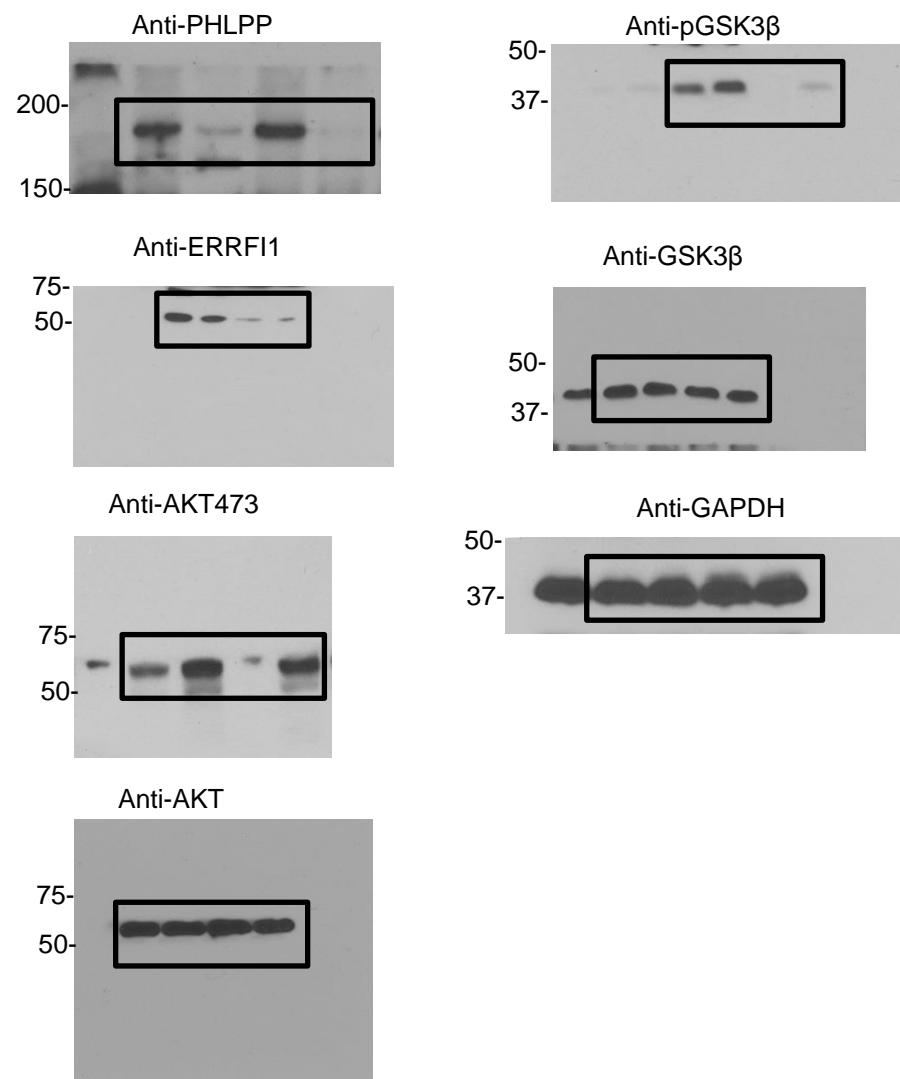

Supplement: EMBR-19-e44767-s012.pdf [file EMBR-19-e44767-s012.pdf]

**Fig 8D**

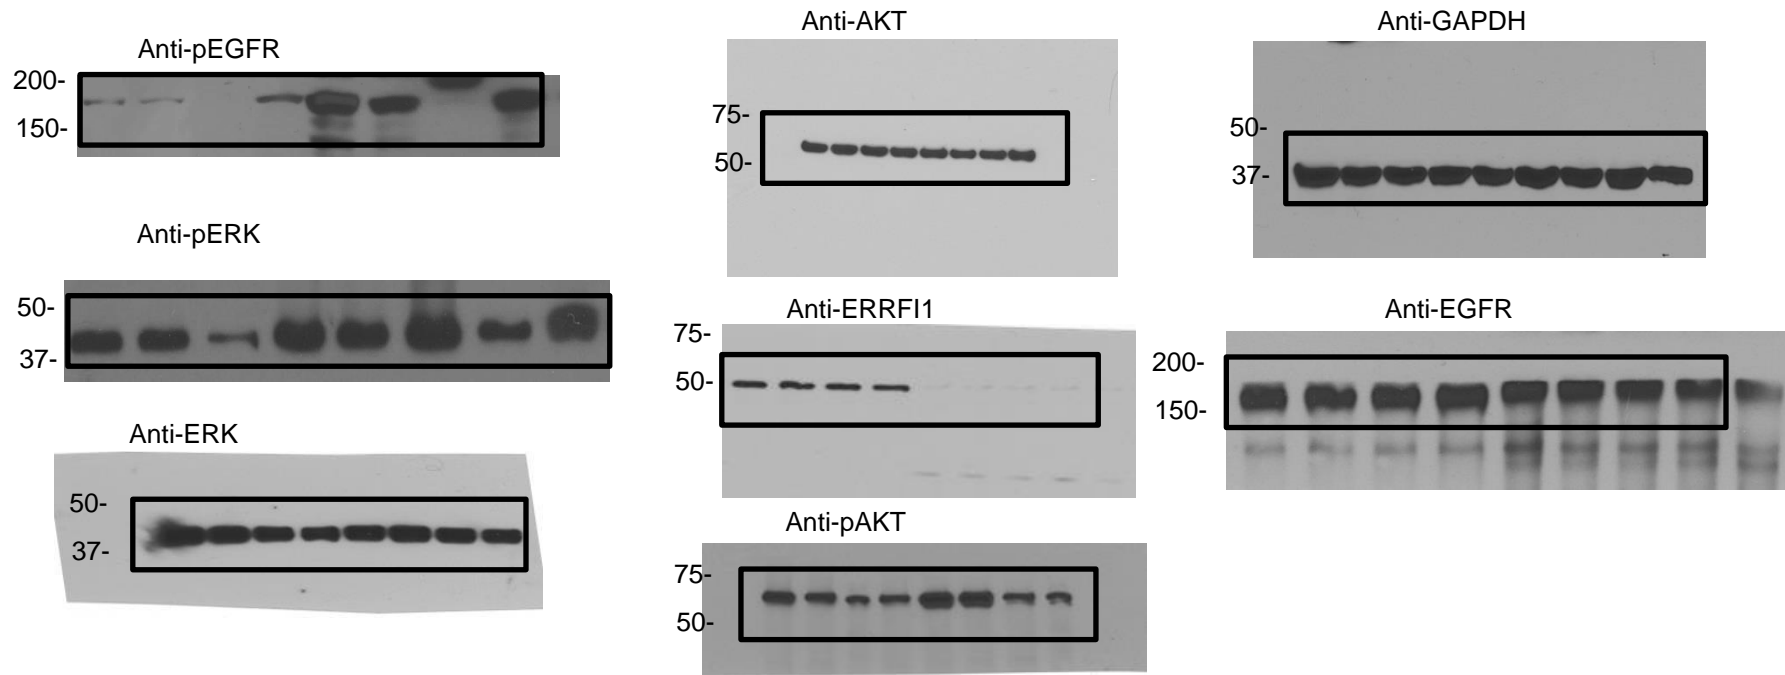

**Fig 8E**

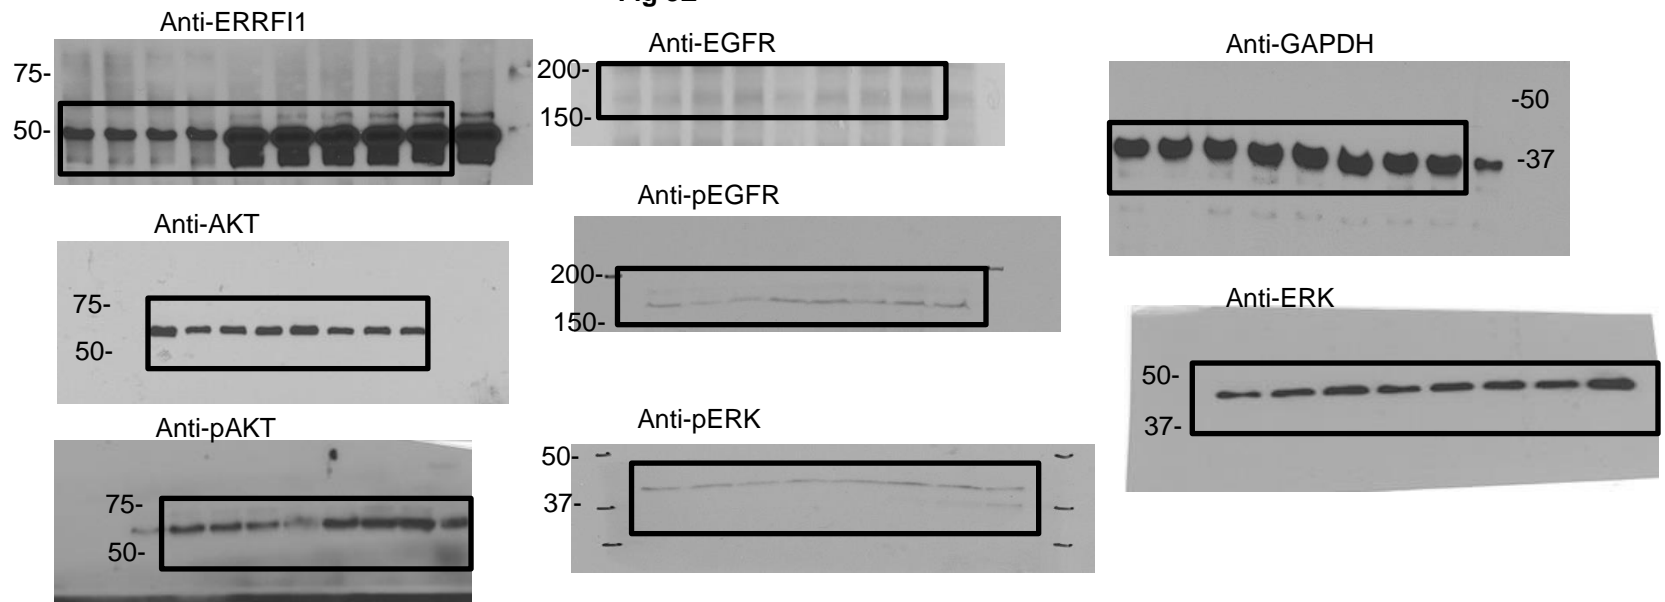

Supplement: EMBR-19-e44767-s013.pdf [file EMBR-19-e44767-s013.pdf]

**Fig 9A**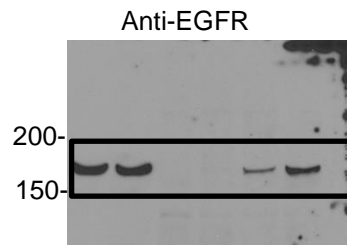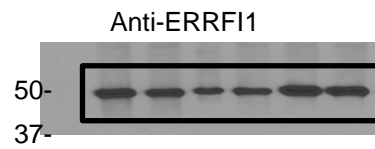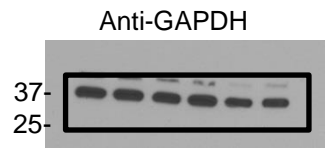**Fig 9F**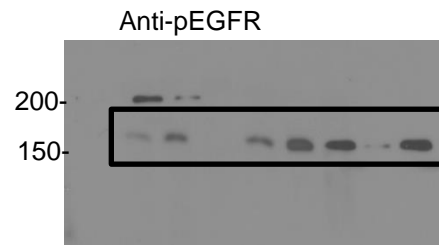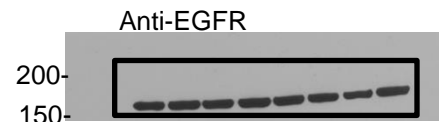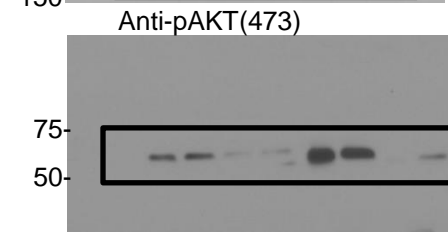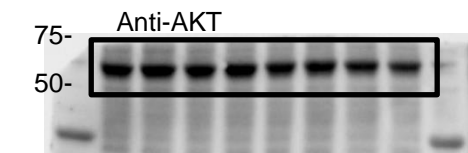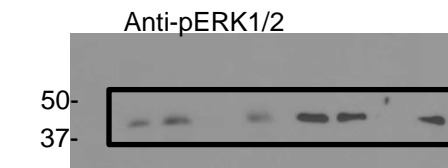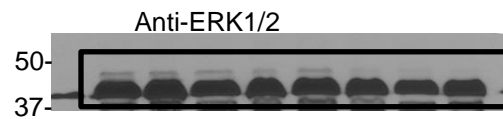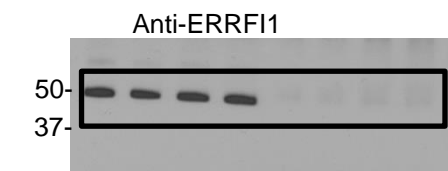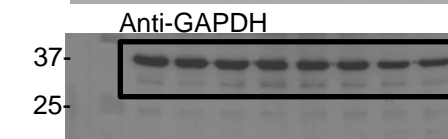**Fig 9G**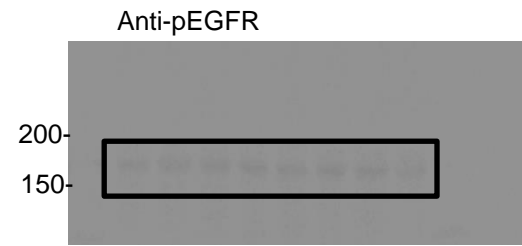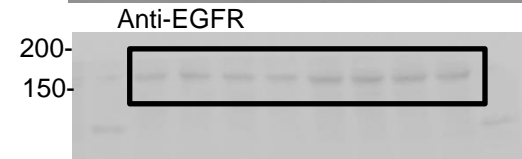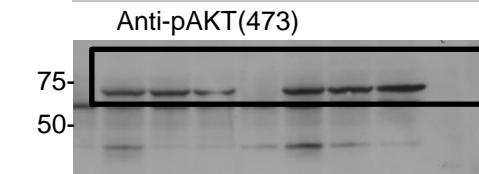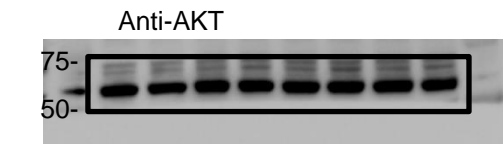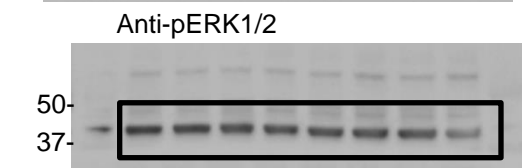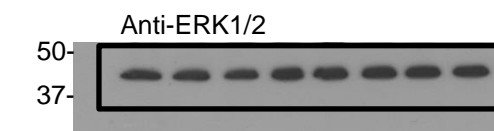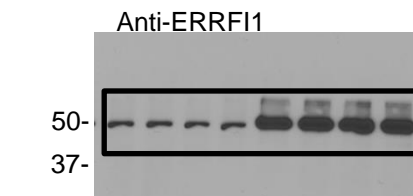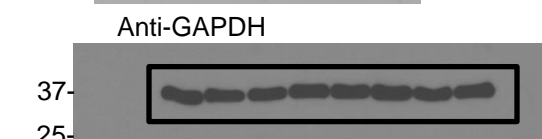

Supplement: EMBR-19-e44767-s014.pdf [file EMBR-19-e44767-s014.pdf]
